1 Temperature sensitive SMA-causing point mutations lead to SMN instability, locomotor  
2 defects, and premature lethality in *Drosophila*

3  
4 Amanda C. Raimer<sup>1,2</sup>, Suhana S. Singh<sup>2,3</sup>, Maina R. Edula<sup>3</sup>, Tamara Paris-Davila<sup>4</sup>, Vasudha  
5 Vandadi<sup>2</sup>, Ashlyn M. Spring<sup>2,#</sup>, and A. Gregory Matera<sup>1,2,3,5,6,\*</sup>

6

7

8 <sup>1</sup>Curriculum in Genetics and Molecular Biology, University of North Carolina, Chapel Hill, NC  
9 27599, USA

10 <sup>2</sup>Integrative Program for Biological and Genome Sciences, University of North Carolina, Chapel  
11 Hill, NC 27599, USA

12 <sup>3</sup>Department of Biology, University of North Carolina, Chapel Hill, NC 27599, USA

13 <sup>4</sup>Gillings School of Global Public Health, University of North Carolina, Chapel Hill, NC 27599,  
14 USA

15 <sup>5</sup>Lineberger Comprehensive Cancer Center, University of North Carolina, Chapel Hill, NC  
16 27599, USA

17 <sup>6</sup>Department of Genetics, University of North Carolina, Chapel Hill, NC 27599, USA

18

19

20 Current addresses:

21 <sup>#</sup>Department of Biology, University of Wisconsin, River Falls, WI 54022, USA

22

23

24 \*Author for correspondence ([matera@unc.edu](mailto:matera@unc.edu))

25

26

27 **ABSTRACT**

28 Spinal muscular atrophy (SMA) is the leading genetic cause of death in young children, arising  
29 from homozygous deletion or mutation of the *SMN1* gene. SMN protein expressed from a  
30 paralogous gene, *SMN2*, is the primary genetic modifier of SMA; small changes in overall SMN  
31 levels cause dramatic changes in disease severity. Thus, deeper insight into mechanisms that  
32 regulate SMN protein stability should lead to better therapeutic outcomes. Here, we show that  
33 SMA patient-derived missense mutations in the *Drosophila* SMN Tudor domain exhibit a  
34 pronounced temperature sensitivity that affects organismal viability, larval locomotor function,  
35 and adult longevity. These disease-related phenotypes are domain-specific and result from  
36 decreased SMN stability at elevated temperature. This system was utilized to manipulate SMN  
37 levels during various stages of *Drosophila* development. Due to a large maternal contribution of  
38 mRNA and protein, *Smn* is not expressed zygotically during embryogenesis. Interestingly, we  
39 find that only baseline levels of SMN are required during larval stages, whereas high levels of  
40 protein are required during pupation. This previously uncharacterized period of elevated SMN  
41 expression, during which the majority of adult tissues are formed and differentiated, could be an  
42 important and translationally relevant developmental stage in which to study SMN function.  
43 Altogether, these findings illustrate a novel *in vivo* role for the SMN Tudor domain in maintaining  
44 SMN homeostasis and highlight the necessity for high SMN levels at critical developmental  
45 timepoints that is conserved from *Drosophila* to humans.

46

47

## 48 INTRODUCTION

49 Spinal Muscular Atrophy (SMA) is the leading genetic cause of death in infants and small  
50 children, with an incidence of ~1:7,000 live births and a carrier frequency of ~1:50 (Prior et al.,  
51 2010; Sugarman et al., 2012; Vill et al., 2019). This progressive neuromuscular disease is  
52 characterized by alpha-motor neuron degeneration and muscle atrophy, resulting in gradual loss  
53 of motor function. SMA symptoms present within a spectrum of disease severity. Left untreated,  
54 patients with the most severe form of the disorder are unable to stand or sit upright, and do not  
55 survive past two years of age (Crawford and Pardo, 1996; Farrar et al., 2017). In contrast, milder  
56 forms of SMA are not typically diagnosed until later in life, and these patients exhibit mild motor  
57 dysfunction, living relatively normal lifespans (Alatorre-Jiménez et al., 2015; Tiziano et al.,  
58 2013).

59 Despite its broad spectrum of severity, SMA is a monogenic disorder that is most  
60 commonly caused by homozygous deletion of *Survival Motor Neuron 1* (*SMN1*) and a  
61 corresponding reduction in the expression of full-length Survival Motor Neuron (SMN) protein.  
62 Animal studies have shown that complete loss of SMN protein results in death *in utero* (Schrank  
63 et al., 1997). However, the presence of a paralogous gene in humans, *SMN2*, allows for the  
64 survival of affected individuals past birth (Coover et al., 1997). The coding region of *SMN2* is  
65 identical to that of *SMN1*, save for five nonpolymorphic nucleotide differences, one of which  
66 causes skipping of exon 7 during splicing in roughly 90% of *SMN2* pre-mRNAs (Lorson et al.,  
67 1999). Transcripts produced by this alternative splicing event are translated into a truncated  
68 version of SMN protein (SMN $\Delta$ 7) and are quickly degraded by the proteasome (Gray et al., 2018;  
69 Lorson et al., 1998). The remaining fraction of full-length transcripts (~10%) encodes full-length  
70 SMN that is identical to protein produced by *SMN1*. In humans, *SMN2* is located on chromosome

71 5q within a highly dynamic genomic region that is prone to both duplications and deletions  
72 (Lefebvre et al., 1995). This has led to significant *SMN2* copy number variation in the population  
73 (Butchbach, 2016; Carpten et al., 1994; Courseaux et al., 2003). Complete loss of *SMN2* has no  
74 phenotypic effect in healthy individuals; however, in SMA patients *SMN2* is the primary genetic  
75 modifier of disease severity (Feldkötter et al., 2002; Lefebvre et al., 1997; Velasco et al., 1996).  
76 Higher *SMN2* copy number produces increased levels of full-length SMN protein, which  
77 corresponds to later disease onset and milder symptoms. Although the precise molecular etiology  
78 of SMA remains unclear, overwhelming evidence shows that reduced SMN protein levels cause  
79 the disease (Ahmad et al., 2016; Briese et al., 2005; Chaytow et al., 2018; Deguise and Kothary,  
80 2017; Li et al., 2014).

81 The importance of SMN protein levels is further evidenced by the fact that the mechanism  
82 of action for both FDA-approved treatments currently available for SMA, Spinraza (nusinersen)  
83 and Zolgensma (onasemnogene abeparvovec), aim to increase SMN protein levels (Sumner and  
84 Crawford, 2018). Although these treatments have dramatically improved the prognosis of SMA  
85 patients, there are still limitations to the therapies that could be addressed using combinatorial  
86 therapies (Gidaro and Servais, 2019; Ramos et al., 2019; Sumner and Crawford, 2018). For  
87 example, it remains to be seen whether these treatments will remain effective over time and into  
88 adulthood, or if the patients might develop symptoms later in life. Additionally, given SMN's  
89 general housekeeping function in the biogenesis of spliceosomal snRNPs (Matera and Wang,  
90 2014), long-term treatment of the CNS may reveal deficits in peripheral tissues over time. Thus,  
91 a multi-pronged approach to precisely control SMN levels and function across tissues is more  
92 likely to prevent SMA disease progression throughout a patient's lifetime.

93           Although most SMA patients carry a homozygous deletion of *SMN1*, 5% of those affected  
94 are heterozygous, harboring a deletion of *SMN1* over a small indel or missense mutation (Lefebvre  
95 et al., 1995; Wirth, 2000). To better understand how *SMN1* missense mutations contribute to  
96 disease, our laboratory has developed *Drosophila* as an SMA model system. Previously, we  
97 generated an allelic series of transgenic fly lines that express SMA-causing point mutations in an  
98 otherwise *Smn* null mutant background (Praveen et al., 2012; Praveen et al., 2014). These animals  
99 express Flag-tagged wildtype or mutant SMN from the native *Smn* promoter (Fig 1A) and have  
100 been used to study SMA phenotypes at the behavioral, physiological, and molecular levels (Garcia  
101 et al., 2013; Garcia et al., 2016; Gray et al., 2018; Praveen et al., 2014; Spring et al., 2019).

102           SMN contains three conserved regions, including the N-terminal Gemin2 binding motif,  
103 the C-terminal YG-box self-oligomerization module and the centrally located Tudor domain. The  
104 presence of disease-causing mutations within each of these three regions demonstrates the  
105 importance of each domain to SMN function. Previous work in *Drosophila* and other models has  
106 demonstrated a functional role for the YG-box in targeting SMN $\Delta$ 7 for degradation by the  
107 proteasome (Cho and Dreyfuss, 2010; Gray et al., 2018). In contrast, very little is known about  
108 the effect of the SMN Tudor domain on SMN protein levels. The canonical function of a Tudor  
109 domain is to bind to methylated arginine or lysine residues, thereby modifying the activity or  
110 function of the target protein (Pek et al., 2012). In the context of SMN, the Tudor domain binds  
111 dimethylated arginines on Sm proteins (Brahms et al., 2001; Bühler et al., 1999). This interaction  
112 assists in assembly and formation of Sm-class small nuclear ribonucleoproteins (snRNPs)  
113 (Gonsalvez et al., 2007; Gonsalvez et al., 2008; Meister et al., 2001; Pellizzoni et al., 2002).  
114 Patient data along with *in vitro* and *in silico* studies indicate that certain Tudor domain mutations  
115 affect SMN protein levels, but the mechanism underlying this phenomenon remains unclear,

116 especially *in vivo* (Hossain and Hosen, 2019; Li, 2017; Sneha et al., 2018; Takarada et al., 2017;  
117 Tripsianes et al., 2011).

118 Here, we present evidence that point mutations in the SMN Tudor domain are temperature  
119 sensitive relative to the WT protein, destabilizing SMN at high temperatures. Additionally, we  
120 demonstrate that this added degree of instability reduces SMN protein levels sufficiently to impact  
121 SMA-related phenotypes such as organismal viability, larval locomotion, and adult longevity. The  
122 temperature-sensitive nature of these mutants also provides a useful experimental system in which  
123 to study how changes in SMN protein levels affect molecular and physiological processes across  
124 animal development. Collectively, the results expand our understanding of the mechanisms that  
125 not only govern SMN protein stability but also SMA etiology.

126

127

## 128 **RESULTS**

### 129 **SMN Tudor domain mutants (TDMs) are temperature-sensitive**

130 Previous work using SMA patient-derived *Smn* missense mutations, modeled in the fly, has  
131 produced robust and reproducible findings. However, in one or two instances, we noticed  
132 inconsistencies in the overall viability of a given fly line that could not be attributed to normal  
133 biological noise. For example, in Praveen et al. (2014), the *Smn*<sup>F70S</sup> mutation line (hereafter F70S)  
134 displayed a relatively mild phenotype, with an eclosion frequency similar to that of the *Smn*<sup>WT</sup>  
135 transgene (hereafter WT). In contrast, Spring et al. (2019) reported a rather severe viability defect  
136 for this same F70S line. The husbandry conditions used in each study were slightly different; the  
137 experiments in the earlier work were performed at room temperature (~22°C) whereas in the  
138 subsequent experiments, animals were kept at a constant 25°C. In addition, we qualitatively

139 observed that certain *Smn* mutant lines displayed a dramatic decrease in viability at 29°C  
140 compared to culturing at 25°C. These two observations led us to characterize the mechanism  
141 underlying this sensitivity, as determinants of SMN function could be of translational value to  
142 SMA patients.

143         Therefore, we examined the effects of temperature on the viability of eleven different  
144 SMA patient-derived mutant lines (Fig. 1A) at two temperature extremes of *Drosophila*  
145 husbandry, 18°C and 29°C, as well as at the standard condition of 25°C. Viability of each  
146 transgenic line was calculated as the fraction of animals that either pupated (% pupation, larval-  
147 to-pupal transition) or eclosed (% eclosion, pupal-to-adult transition) (Fig. 1B,C). A majority of  
148 our SMA models displayed the expected trend, with the highest viability observed at 25°C and  
149 reduced viability at the extremes. In contrast, all but one of the SMN Tudor domain mutant lines  
150 (TDMs) displayed an inverse correlation between viability and temperature. That is, lower  
151 temperatures increased viability in TDMs relative to 25°C, whereas higher temperatures  
152 decreased viability. The decrease in pupation frequency for the TDMs was dramatic and  
153 statistically different from the moderate decrease observed for mutations in other regions of SMN  
154 (Fig. 1B). Similarly, only the TDM lines displayed increased eclosion frequencies at 18°C  
155 compared to 25°C (Fig. 1C). Collectively, these data indicate that the F70S, V72G, G73R, and  
156 I93F mutations in the SMN Tudor domain are temperature-sensitive (ts) alleles.

157

### 158 **SMN Tudor domain mutants display SMA-related phenotypes in response to small changes** 159 **in temperature**

160 We next examined the effect of minor changes in temperature by raising animals at 22°C and  
161 27°C. The SMN WT and T205I YG box domain mutant lines were used as controls. Although the

162 changes in temperature were relatively small ( $\pm 2-3^{\circ}\text{C}$ ), the effects on the TDMs viability were  
163 still substantial (Fig 2A,B). The WT and T205I control lines still display some variability in  
164 pupation and eclosion percentages. In contrast, although a percentage of all the TDMs do manage  
165 to pupate to at all temperatures, they again show a drastic decrease in viability that inversely  
166 correlates with temperature.

167 Having established the temperature-sensitive nature of the TDMs, we next sought to  
168 examine more SMA-related phenotypes such as muscle function indirectly through locomotor  
169 ability. Although the most extreme temperatures,  $18^{\circ}\text{C}$  and  $29^{\circ}\text{C}$ , showed the most drastic  
170 changes in viability, certain limitations make these temperatures suboptimal for analyzing  
171 *Drosophila* larval locomotion. Proper developmental staging of larvae in many assays is critical  
172 so that changes observed between wildtype and TDMs are solely attributed to the mutation and  
173 not different developmental stages (Garcia et al., 2013). Because TDMs raised at  $25^{\circ}\text{C}$  die  
174 sometime during pupation, the wandering 3<sup>rd</sup>-instar larval stage is one of the most  
175 developmentally significant and technically tractable stages to use when performing larval assays.  
176 However, most TDMs do not reach the wandering 3<sup>rd</sup>-instar at  $29^{\circ}\text{C}$ , and viability of the WT  
177 transgenic line is markedly affected at both  $18^{\circ}\text{C}$  and  $29^{\circ}\text{C}$ . In contrast, culturing at  $22^{\circ}\text{C}$  and  
178  $27^{\circ}\text{C}$  allows for selection at wandering 3<sup>rd</sup>-instar stage as well as stable wildtype viability.

179 Larval locomotion assays were carried out on animals raised at  $22^{\circ}\text{C}$  and  $27^{\circ}\text{C}$ , as  
180 described previously (Spring et al., 2019). Crawling speed was expressed in terms of body lengths  
181 per second (BLPS), which provides a comparable measure of larval speed regardless of body size  
182 (Fig. 2C). Larvae expressing either WT or T205I SMN (a YG box mutant) display no significant  
183 changes in locomotion when raised at  $22^{\circ}\text{C}$  versus  $27^{\circ}\text{C}$ . In contrast, TDM animals raised at  $22^{\circ}\text{C}$   
184 showed significantly improved locomotor function compared to their counterparts raised at  $27^{\circ}\text{C}$



185 (Fig 2C). These results highlight the fact that neuromuscular phenotypes are exacerbated  
186 specifically in the TDMs raised at elevated temperatures.

187

### 188 **Reduced SMN levels caused by instability underlie TDM sensitivity to temperature**

189 Small perturbations in SMN protein levels are known to cause stark changes in patient disease  
190 severity (Lefebvre et al., 1997). We therefore evaluated SMN protein levels as a potential cause  
191 of the temperature sensitivity observed in the TDMs. SMN point mutation lines bearing a single  
192 copy of the *Smn* transgene were raised at 22°C, 25°C, or 27°C, and the SMN protein levels of  
193 wandering 3<sup>rd</sup>-instar larvae were measured by western blotting. Band intensities were then  
194 normalized against the total amount of protein in each sample (Fig. S1). Representative blots  
195 showing SMN protein levels in the WT and mutant larvae raised at the three different temperatures  
196 are shown in Fig. 3A. As shown, SMN levels in WT and T205I mutant animals remain relatively  
197 constant regardless of temperature. In contrast, SMN levels are markedly decreased in TDMs  
198 raised at higher temperatures. Quantification of multiple biological replicates (Fig. 3B) confirms  
199 that the trend of decreasing SMN protein levels holds for nearly all of the TDMs. Note that the  
200 very low levels of SMN in the V72G mutants raised at 25° and 27°C are close to the detection  
201 limit, so the trend is less visible in that line. Collectively, these data indicate that temperature  
202 sensitivity of TDMs is likely driven by a reduction in SMN protein levels.

203 To directly test the relative stabilities of WT and TDM SMN proteins in the absence of  
204 new protein synthesis, we carried out an *ex vivo* protein stability assay similar to the one described  
205 by Deliu et al., 2017. Wandering 3<sup>rd</sup>-instar WT and F70S animals (raised at 22°C) were dissected  
206 and then the larval filets were incubated in cell culture medium at 29°C in the presence or absence  
207 of cycloheximide (CHX) over a time course of 12 hours (Fig 4A). The F70S mutant was chosen

208 for this assay because it displayed a pronounced temperature-sensitive phenotype. Samples were  
209 then analyzed for SMN protein levels via western blotting as shown in Fig. 4B. Puromycin was  
210 used as a secondary control to confirm that protein synthesis was effectively stalled in the presence  
211 of CHX (Deliu et al., 2017) (Fig S2). In untreated WT samples, SMN levels show a mild reduction  
212 from 0 to 12 hours post-exposure; however, in the presence of CHX, WT protein levels decrease  
213 consistently over the timecourse, illustrating the natural levels of SMN degradation during this  
214 time frame. In contrast, the F70S mutation causes SMN levels decrease more rapidly (Fig. 4B).  
215 Multiple replicates of each genotype at each timepoint verify these trends (Fig 4C), confirming  
216 that the F70S TDM is significantly less stable than its WT counterpart. These data provide the  
217 first evidence showing that SMN Tudor domain mutations trigger protein instability *in vivo*,  
218 providing molecular insight into mechanisms by which these point mutations can cause SMA.  
219 Additionally, the temperature-sensitive nature of these alleles provides a powerful tool for  
220 temporally regulating SMN protein levels throughout development and lifespan.

221

222 **High levels of SMN are not required during normal larval development but are essential for**  
223 **metamorphosis into adults**

224 Numerous studies in SMA patients and animal models have shown that high SMN levels are vital  
225 during the early stages of development (Govoni et al., 2018; Jablonka and Sendtner, 2017; Ramos  
226 et al., 2019). Consistent with this idea, we previously showed that null mutations in *Drosophila*  
227 *Smn* result in developmental arrest and early larval lethality (Garcia et al., 2013; Praveen et al.,  
228 2012; Rajendra et al., 2007). Maternally deposited SMN is exhausted shortly after the first larval  
229 instar (Praveen et al., 2012), but a detailed analysis of SMN levels during later stages of  
230 development has not been performed. We therefore mined transcriptomic, proteomic and

231 chromatin packaging databases to analyze expression from the *Smn* locus over developmental  
232 time. Furthermore, we exploited the temperature sensitivity of TDMs to help determine the  
233 requirements for high levels of SMN during larval, pupal and adult stages of *Drosophila*  
234 development.

235 As shown in Fig. 5A, developmental proteomic analysis shows that SMN protein is nearly  
236 300-fold greater in embryos than it is during larval stages (Casas-Vila et al., 2017). Remarkably,  
237 chromatin accessibility (FAIRE-seq) analysis (McKay and Lieb, 2013) reveals that the *Smn*  
238 promoter region is essentially closed throughout, embryonic development, suggesting its  
239 transcriptional quiescence (Fig. 5B). Indeed, transcriptomic (RNA-seq) profiling of the same  
240 embryos shows that *Smn* mRNA levels progressively decrease during embryogenesis (Fig.  
241 5B,C)(Graveley et al., 2011). We conclude that nearly all of the *Smn* mRNA and protein present  
242 in the animal during its first 24 hr of life is likely maternally deposited. Western blot analysis of  
243 *Smn* null mutants during early larval development showed that the maternal contribution of SMN  
244 protein persists throughout the first larval instar (L1), and is essentially depleted by the second,  
245 L2 (Praveen et al., 2012). These data are completely consistent with the developmental proteomics  
246 (Fig. 5A), showing that SMN levels during L2, early L3 and late (wandering) L3 are at or below  
247 the limits of detection (Casas-Vila et al., 2017). Moreover, SMN levels in newly-eclosed females  
248 are also very low but rise dramatically in 1-week old adults (Fig. 5A), again suggesting that the  
249 high levels of SMN detected in the older females is due to the production of eggs.

250 Transgenic lines expressing either *Smn* TDMs or controls were initially raised at 29°C  
251 (permissive), then switched to 22°C (non-permissive) at 1- or 2-days post-egg laying (DPE) and  
252 viability was assessed (Fig. 5D). Somewhat surprisingly, the large maternal contribution of SMN  
253 appears to be sufficient for embryonic development, even at the non-permissive temperature

254 (Figs. 5E, F). Note, because SMN is required for ovarian development (Lee et al., 2009), we are  
255 unable to generate animals that completely lack maternal SMN. However, females that are raised  
256 at permissive temperature and then switched to the non-permissive temperature for mating and  
257 egg-laying are able to produce viable offspring if the progeny are switched to permissive  
258 temperature at either L1 or L2 (Fig. 5F). Control TDM larvae that are maintained at 29°C for the  
259 entire timecourse failed to pupate (Fig. 5E). Thus, as suggested by the proteomic data (Fig. 5A),  
260 high levels of SMN do not appear to be required for progression from L1 to L3.

261         Interestingly, the expression of SMN rises dramatically during pupation, only to drop  
262 again during later stages (Fig. 5A). In preparation for this second burst of activity during  
263 metamorphosis, the *Smn* promoter region is largely nucleosome-free by the time animals reach  
264 the wandering third (L3) instar and remains open in the pharate adult (Fig. 5B). To determine  
265 whether high levels of SMN are required for larval progression, pupariation and eclosion, we  
266 carried out temperature switch experiments. Progeny were initially raised at 22°C and then  
267 switched to 29°C after they reached the wandering 3<sup>rd</sup>-instar (Fig 6A). TDM larvae exposed to  
268 the non-permissive temperature at this later stage of development experienced significantly  
269 reduced pupation (Fig 6B). Even more striking, eclosion frequencies of the TDM larvae were  
270 similar to those of larvae that had been raised exclusively at 29°C (Fig 6C). These results  
271 demonstrate that although elevated SMN levels are not required for the earliest stages of larval  
272 development, high levels are required in order to complete metamorphosis.

273

#### 274 **Baseline levels of SMN are required for normal adult longevity**

275 Finally, we examined the effect of decreased SMN stability during adulthood. Studies in mice  
276 show that high SMN levels are not required for survival as adults, however a baseline level is

277 necessary for normal longevity (Sahashi et al., 2013). To test if the same trend holds in the fly, a  
278 subset of homozygous *Smn* transgenic stocks containing the WT, F70S, G73R, or I93F transgenes  
279 (as described in Materials and Methods) was used. These lines were raised through embryonic,  
280 larval, and pupal development at 25°C, with the exception of F70S, which had to be raised at  
281 22°C in order to produce a testable number of adults. Within the first 24 hours post-eclosion, adult  
282 animals were either maintained at 25°C or switched to 29°C. This paradigm allowed us to assess  
283 the effects on longevity when SMN protein is reduced exclusively during the adult stage. Adult  
284 longevity was measured by recording the number of surviving adults every 2 days post-eclosion  
285 (Fig. 7A,B). As expected, all genotypes, including WT, showed reduced longevity at 29°C (Fig.  
286 7A) compared to 25°C (Fig. 7B,C). However, the TDMs that were switched to non-permissive  
287 temperature experienced a significant drop in survival (dying within 6-16 days) compared to their  
288 permissive temperature counterparts (24-38 days) (Fig. 7A,B). To account for the baseline effects  
289 of elevated rearing temperature, we compared survival at 25°C and 29°C for each genotype (ratio:  
290 days to 10% survival at 29°/days to 10% survival at 25°C) (Fig. 7D). Importantly, when  
291 comparing the relative survival at the 10% survival threshold, the longevity of the WT line was  
292 56% of that at 25°C. The G73R and I93F TDMs show a significant difference in longevity  
293 between these temperatures compared to WT, displaying 29°C longevities 32% and 35%  
294 the length of the respective longevities at 25°C (Fig. 7D).

295         The F70S mutant showed 51% relative survival that was not significantly different  
296 from WT (Fig. 7D). This surprising result is hypothesized to be due to the fact that the F70S  
297 adults remain severely affected at 25°C (Fig. 1B,C), whereas the G73R and I93F defects at  
298 25°C are mild. To account for this, a second study was carried out at 22°C with the WT and  
299 F70S transgenic stocks (Fig. 7E). Unlike other culturing temperatures, the WT and F70S

300 longevity was similar at 22°C. When comparing the relative survival of these genotypes  
301 between 29°C and 22°C, there is a statistically significant difference in that the WT longevity  
302 displays milder changes in longevity (32%) than the F70S TDM (23%). F70S adults also  
303 showed a sex-specific difference in longevity that was not seen in the WT adults (Fig. S3).  
304 These data indicate that the TDMs have a differential sensitivity to temperature even after  
305 development is complete, and that an above-baseline level of SMN is needed into adulthood.  
306 Overall, these temperature-sensitive TDM lines can be utilized to further study the  
307 molecular, physiological, and behavioral consequences of modulating SMN protein levels in  
308 a living, developing organism.

309

## 310 **DISCUSSION**

311 In this study, a series of point mutations within the SMN Tudor domain were found to exhibit  
312 pronounced temperature sensitivity relative to the wildtype or YG-box mutant SMN proteins. This  
313 differential sensitivity leads to significantly reduced SMN protein levels in the TDMs at higher  
314 temperatures. We utilized this paradigm to assess the effects of temporally manipulating SMN  
315 protein levels across various developmental timepoints.

316

### 317 *Effects of Tudor domain mutations on SMN stability*

318 SMN protein levels are the strongest known modifiers of SMA disease severity, and small  
319 changes in these levels can dramatically affect age-of-onset and symptomatic severity. The  
320 relationship between SMN levels and SMA severity can be described using a two-threshold model  
321 (O'Hern et al., 2017). At levels above the upper threshold of SMN protein, individuals are  
322 unaffected. Below the second (lower) threshold, organisms die very early in development.

323 Between these two thresholds of SMN expression is a region termed the “SMA zone,” wherein  
324 small changes in SMN levels cause large changes in disease severity (O’Hern et al., 2017).

325 Here, we show that single residue substitutions in the SMN Tudor domain directly impact  
326 SMN protein stability *in vivo*. This finding has important implications for the effects of similar  
327 mutations on SMA patients. In *Drosophila*, TDMs exhibit reduced SMN levels, leading to defects  
328 in organismal viability, locomotion and lifespan when animals are raised at higher temperatures  
329 (27°C and 29°C.). This idea is consistent with data from SMA patients suggesting that certain  
330 TDMs lead to reduced SMN protein levels in human cells (Takarada et al., 2017). Indeed, the  
331 phenotype of the *Drosophila* F70S mutant at the non-permissive temperature more accurately  
332 aligns with that of the corresponding human *SMN1* missense mutation, W92S, which causes Type  
333 1 SMA (Kotani et al., 2007). Thus, the acute sensitivity of the TDMs to small shifts in temperature  
334 highlights a previously unrecognized variable in SMN biology.

335 Comparing our phenotypic data with the SMN Tudor domain structure sheds light on the  
336 relative importance of specific regions of the protein on its overall stability. Previous studies  
337 implicated the YG box in regulating SMN protein levels, however this is thought to occur via a  
338 completely distinct mechanism. That is, self-oligomerization of SMN leads to sequestration of a  
339 ubiquitin-dependent degron motif located within the SMN C-terminal region (Cho and Dreyfuss,  
340 2010; Gray et al., 2018). The only Tudor domain mutation we assayed that does not display  
341 differential temperature sensitivity is Y107C. Unlike the other TDMs we tested, Y107C is located  
342 within the dimethylarginine-binding “pocket” of the Tudor domain (Tripsianes et al., 2011), and  
343 likely impacts SMN’s ability to bind Sm proteins and other potential targets.

344 One outstanding question is how biochemical/biophysical properties of these TDMs affect  
345 protein stability. It is likely that some or all of these mutations cause misfolding of the normal

346 tertiary structures within the Tudor domain (Fig 8A). Previous *in vitro* and *in silico* studies showed  
347 that certain TDMs lead to misfolding and decrease stability (Hossain and Hosen, 2019; Li, 2017;  
348 Sneha et al., 2018; Tripsianes et al., 2011). Our own modeling shows that most SMN TDMs  
349 cluster around the same structural motif and cause a steric clash within this region when mutated  
350 (Fig 8B). It is also possible protein instability is due to loss of stabilizing interactions with binding  
351 partners, or a combination of both. However, our findings represent the first *in vivo* studies to  
352 measure the relative stability of SMN TDMs. Moreover, our experimental system allows us to  
353 test the function of an individual SMN mutant in the absence of wildtype SMN. These findings  
354 could prove important when developing treatments aimed at increasing SMN levels in patients.  
355 For example, small molecules targeting the Tudor domain could potentially improve SMN  
356 stability and increase protein levels at the post-translational level.

357

### 358 ***Temporal requirement for high SMN levels across development***

359 In addition to uncovering a second disease mechanism, the discovery of temperature-sensitive  
360 SMN alleles provides a new genetic tool for the *in vivo* study of SMA-related phenotypes. Here,  
361 we have used this temporally-manipulatable system to test the requirements for high levels of  
362 SMN during *Drosophila* development. By manipulating the timing of exposure to permissive and  
363 non-permissive temperatures, we observed that production of high SMN levels is not required for  
364 larval development (1-2 DPE). Note that a baseline level of SMN is still required during these  
365 stages, as we and others have reported that *Smn* null animals undergo an early developmental  
366 arrest (Garcia et al., 2013; Shpargel et al., 2009).

367 We found that high SMN levels are crucial between the wandering 3<sup>rd</sup>-instar larval stage  
368 and the end of pupation. This finding correlates with whole-organism proteomic data showing



369 that SMN levels are extremely high during both embryonic and pupal stages of *Drosophila*  
370 development (Casas-Vila et al., 2017). Interestingly, both embryonic and pupal stages involves  
371 the production of a new free-living animal. That is, embryogenesis results in a larva and  
372 metamorphosis involves a near complete regrowth of the body into an adult animal. As such,  
373 *Drosophila* pupal development more closely resembles peri-natal development in mice and  
374 humans. Our results show that it may be more medically relevant to directly compare  
375 developmental stages in which the majority of tissue formation and differentiation takes place.  
376 Thus, in terms of translational medicine, pupariation is perhaps a more appropriate stage of  
377 development on which to focus future studies of neuromuscular development.

378

### 379 ***Temperature-sensitive SMN mutants as novel genetic tool for studying SMA***

380 These temperature-sensitive SMN mutants can now be utilized as a system to further interrogate  
381 the effects of SMN protein level homeostasis at different stages of development. The ability to  
382 control SMN protein levels in our fruit fly lines using temperature allows us to more easily test  
383 molecular, physiological, and behavioral effects of reduced SMN levels during later  
384 developmental stages that were previously difficult to study because few individuals reached that  
385 stage. Similarly, we now have the ability to quickly rescue SMN protein levels simply by  
386 switching culturing temperatures. Altering SMN levels will enable us to study various  
387 longitudinal effects of SMN rescue at different points in development.

388 This model also provides a tool to screen for other factors involved in SMN biology and  
389 disease etiology. The TDM stable stocks can be successfully maintained at lower temperatures  
390 (22°C) and have the advantage of having no WT SMN, unlike the parental animals in a cross.  
391 These stable stocks are also beneficial because raising their culturing temperature can produce a

392 situation where the majority of individuals die just before pupation or eclosion. When crossed to  
393 mutants of candidate genes or deficiency lines at these higher temperatures, any change in  
394 viability would be relatively easy to distinguish and signal a potential genetic interaction with  
395 *Smn*.

396 In conclusion, we have discovered a domain-specific effect on SMN stability that impacts  
397 SMN protein levels, motor function, and viability in *Drosophila* models of SMA. Further study  
398 of the Tudor domain and its role in the stability of SMN protein may be an important avenue for  
399 developing future SMA treatments that are effective in combination with existing therapies. The  
400 development of this temperature-sensitive model of SMA in *Drosophila* has allowed us to  
401 uncover the critical development timepoints for high SMN levels. In the future, this system could  
402 be used to further elucidate important functions of SMN during these stages and screen for novel  
403 disease interactors and pathways.

404

405

## 406 MATERIALS AND METHODS

### 407 Fly lines and husbandry

408 Balanced patient mutation lines (*Smn*<sup>X7</sup>, *Smn*<sup>TG</sup>/TM6B-GFP) were generated as described in  
409 Praveen et. al., 2012, where “TG” represents one of the fourteen *Smn* wildtype (WT) or mutant  
410 transgenes. Briefly, the lines were generated using ΦC31 integration at an insertion site located  
411 in chromosome band position 86F8. The *Smn* transgenic construct is a ~3kb fragment containing  
412 the entire *Smn* coding region, expression of which is driven by the native *Smn* promoter. The  
413 transgene also contains an N-terminal 3X-FLAG tag that was used in this study to visualize SMN  
414 protein, circumventing the potential differences in α-SMN antibody binding between mutant

415 forms of SMN. The *Smn*<sup>X7</sup> and *Smn*<sup>D</sup> alleles are previously described null alleles (Chang et al.,  
416 2008; Rajendra et al., 2007), and both stable stocks are GFP-balanced. To generate single-copy  
417 transgenic mutants (*Smn*<sup>X7</sup>, *Smn*<sup>TG</sup>/*Smn*<sup>X7</sup>) for the viability, locomotion, Western blot, and  
418 developmental timing assays, *Smn*<sup>X7</sup>/TM6B-GFP virgin females were crossed to *Smn*<sup>X7</sup>,  
419 *Smn*<sup>TG</sup>/TM6B-GFP males at the desired temperature (18, 22, 25, 27, or 29°C). Crosses were  
420 performed on molasses-based agar plates with yeast paste, and then GFP-negative larvae were  
421 sorted into vials containing standard molasses fly food at the 2<sup>nd</sup>-instar larval stage to prevent  
422 competition from heterozygous siblings.

423 The stable wildtype (WT) and mutant (F70S, G73R, and I93F) lines used in the longevity assays  
424 were generated by crossing *Smn*<sup>D</sup>/TM6B-GFP virgin females to *Smn*<sup>X7</sup>, *Smn*<sup>TG</sup>/TM6B-GFP males  
425 at room temperature. The progeny of these lines lacking the balancer chromosome were the  
426 allowed to propagate and develop into stable lines. The *Smn* copy number of individuals in these  
427 stocks is variable, with either one or both of the animal's third chromosomes containing the  
428 transgene.

429 The WT and F70S lines used in the cycloheximide experiments were stable stocks homozygous  
430 for the transgene. These stock were generated by crossing males from the variable copy number  
431 stocks above to *Smn*<sup>X7</sup>, *Smn*<sup>TG</sup>/TM6B-GFP virgin females, and then sorting against the balancer  
432 chromosome markers.

433 All of the stocks except for the stable patient mutation lines were raised and maintained in a 25°C  
434 incubator unless being used for an assay. The stable patient mutation lines were raised and  
435 maintained at room temperature unless being used for an assay. Experimental temperatures for  
436 the assays were maintained using 18, 22, 25, 27, and 29°C incubators. All stocks were maintained  
437 in bottles containing standard molasses fly food.

## 438 **Viability assays**

439 To assess viability, crosses were maintained and progeny were raised at the desired temperature  
440 on molasses agar plates. 25-50 GFP-negative progeny at the late 2<sup>nd</sup> to early 3<sup>rd</sup>-instar stages were  
441 sorted into vials containing standard molasses fly food. After sufficient time had passed, pupal  
442 cases were counted and marked, and any adults were counted and removed from the vial. Any  
443 new pupal cases or adults were recorded every two days. The % viability was calculated at both  
444 the pupal and adult stages. Pupal viability (% pupation) was calculated by dividing the number of  
445 pupal cases by the initial number of larvae and multiplying by 100 ( $\# \text{ pupae} / \# \text{ initial larvae} * 100$ ).  
446 Adult viability (% eclosion) was calculated similarly but using the number of adults as the  
447 numerator ( $\# \text{ adults} / \# \text{ initial larvae} * 100$ ). Each vial was considered a biological replicate in  
448 respect to calculating averages and standard error.

## 449 **Larval locomotion assays**

450 To assess the motor function of larvae at permissive and non-permissive temperatures, crosses  
451 were maintained and progeny were raised at desired temperature. Once the larvae reached  
452 wandering 3<sup>rd</sup>-instar larval stage, 1-5 larvae were placed onto the locomotion stage (a large  
453 molasses plate) at room temperature. The stage was then placed into a recording chamber to  
454 control light and reflections on the stage. Once all larvae were actively crawling, movement was  
455 recorded for at least 62 seconds on an iPhone6 at minimum zoom. Two recordings were taken for  
456 each set of larvae. At least 30 larvae were recorded for each experimental group. Locomotion  
457 videos were transferred to a PC and converted to raw video .avi files using the ffmpeg program.  
458 Videos were then opened in Fiji/ImageJ (<https://imagej.net/Fiji>), trimmed to about 60sec of video,  
459 and converted into a series of binary images. The wrMTrck plugin for ImageJ  
460 (<http://www.phage.dk/plugins/wrmtrck.html>) was used to analyze the video and determine larval

461 size, average speed of movement, and average speed normalized to larval size (body lengths per  
462 second or BLPS) (Brooks et al., 2016). Each larvae was treated as an individual when calculating  
463 average and standard error.

#### 464 **SMN Western blot analysis**

465 To measure SMN protein levels of at different temperatures, 8-12 wandering 3<sup>rd</sup>-instar larvae  
466 were collected per sample, snap frozen in a dry ice ethanol bath, and stored at -80°C. Each sample  
467 was considered a biological replicate. Larval samples were then homogenized in RIPA buffer and  
468 10X protease inhibitor cocktail (Halt™ Protease Inhibitor Cocktail (100X), ThermoFisher) with  
469 a micropestle and spun at 13,000rpm at 4°C to separate the soluble phase. The supernatant was  
470 transferred to a new microcentrifuge tube and spun again to separate any lipid phase. The protein  
471 samples were then quantified using Bradford assay (BioPhotometer, eppendorf) and Western  
472 samples were prepped with 50ug of protein and 1X SDS loading buffer then denatured in a 95°C  
473 heat block for 5min.

474 Western samples were loaded and run in Mini-PROTEAN TGX Stain-Free Gels (BIO-RAD) at  
475 300V for 15min (Mini PROTEAN® Tetra Cell, BIO-RAD). The total protein marker was UV-  
476 activated for 105 seconds (Fisher Biotech 312nm Transilluminator) and then the gel was placed  
477 in the transfer cassette (XCell II™ Blot Module, novex® life technologies™) and transferred on  
478 to low-fluorescence PVDF membrane (Immun-Blot® LF PVDF Membrane Roll, BIO-RAD).  
479 After the transfer, total protein on the membrane was imaged using UV exposure with an  
480 Amersham Imager 600 (GE). The membrane was then blocked in 5% milk (in TBST) for 1hr at  
481 room temperature with gentle shaking, then incubated with  $\alpha$ -FLAG HRP-conjugated primary  
482 antibody (1:10,000 in TBST; Monoclonal ANTI-FLAG® M2-Peroxidase (HRP) antibody  
483 produced in mouse, SIGMA) overnight at 4°C. The next day the membrane was washed 3 times

484 for 5min in TBST at room temperature, then incubated with detection reagent (Amersham ECL™  
485 Prime Western Blotting Detection Reagents, GE) for 5min. The chemiluminescence was detected  
486 and imaged using an Amersham Imager 600 (GE). The FLAG-SMN levels and total protein were  
487 quantified using the ImageQuant TL 8.1 (1D analysis) program. Any samples with low-quality  
488 total protein signal were excluded from the analysis. Averages and standard error were determined  
489 based on the biological replicates for each condition. Any outliers were determined using the  
490 Grubbs' test (<https://www.graphpad.com/quickcalcs/grubbs1/>) and removed from the data set  
491 before analysis.

#### 492 **Protein stability assays**

493 To assess the stability of SMN protein, cycloheximide treatment was applied to wandering 3<sup>rd</sup>-  
494 instar larvae. Larvae were produced from crosses and contained a single copy of the *Smn*  
495 transgene. Crosses and progeny were maintained at 22°C, where embryos were laid onto  
496 molasses-based agar plates. Larvae of the desired genotype were sorted into molasses food vials.  
497 When the larvae reached the wandering 3<sup>rd</sup>-instar developmental stage, they were dissected open  
498 to expose all the internal and external tissues to treatment media. The simple dissection was done  
499 by using dissecting tweezers to peel back a strip of the larva's exoskeleton. 5 larvae were dissected  
500 for each sample. The control treatment contained 5ug/uL puromycin (SIGMA-ALDRICH,  
501 puromycin dihydrochloride from *Streptomyces alboniger* (P7255), stock solution of 25mg/mL  
502 dissolved in autoclaved water) in Schneider's *Drosophila* Medium (1X) (gibco, 21720-024). The  
503 experimental treatment contained 5ug/uL puromycin and 100ug/mL cycloheximide (SIGMA,  
504 C7698, stock solution of 10mg/mL dissolved in autoclaved water) in Schneider's media. Larvae  
505 were placed in a microcentrifuge tube containing 500uL of treatment, and then nutated with the  
506 treatment for the desired time (hrs) at 29°C. After the desired treatment time, media was removed

507 and sample preparation, protein extraction, and Western blot analysis were performed as  
508 described above. The  $\alpha$ -puromycin antibody was used at a concentration of 1:1000 (Kerafast,  
509 #EQ0001), followed by an  $\alpha$ -mouse secondary antibody at a concentration of 1:5000 (Pierce,  
510 PI31430).

### 511 **Temperature switch assays**

512 To assess viability after exposure to permissive and non-permissive temperatures, SMN mutant  
513 larvae were switched between 22°C and 29°C at different developmental stages. The temperature  
514 switch assays in Figures 5 and 6 were performed with crosses, where mutant progeny contained  
515 one copy of the *Smn* transgene and a maternal component of wildtype SMN.

516 During the nonpermissive-to-permissive viability assays, crosses and progeny were maintained  
517 and raised at 29°C. Embryos were laid on molasses-based agar plates within a 4-hour time  
518 window, then either 1 or 2 days post-egg laying (DPE) the molasses plates were moved from 29°C  
519 to 22°C. Within 36 hours of being switched to 22°C, mutant larvae of the desired genotype were  
520 separated from their siblings and placed in a vial of molasses food (~50 larvae/vial). Viability was  
521 then assessed by counting the number of pupae (% pupation) and adults (% eclosion) in each vial  
522 compared to the number of larvae as described above. Each vial was treated as a separate replicate  
523 and was used to calculate averages and standard error.

524 During the permissive-to-nonpermissive viability assays, the parental generation and progeny  
525 were raised at 22°C with the same molasses plate system and timed temperature switches as  
526 described above, with the single difference being that developing larvae were moved from 22°C  
527 to 29°C. In the wandering-3<sup>rd</sup> temperature switch, progeny remained at 22°C and larvae were  
528 sorted into a molasses food vial while still at 22°C. Once the larvae began to wander, each larva

529 was transferred to a new vial at 29°C (~50 larvae/vial). Viability was assessed with the same  
530 method as above.

### 531 **Longevity assays**

532 To assess longevity at permissive and non-permissive temperatures, newly eclosed adults (less  
533 than 24hr post-eclosion) were collected and put into fresh vials of molasses food. Males and  
534 females were separated into different vials. Each vial contained 10 or fewer adults to reduce stress  
535 and crowding. Around half of these adults remained at the permissive temperature (25°C or 22°)  
536 and the other half were switched to a non-permissive temperature (29°C). Animals were  
537 transferred to a fresh vial 2-3 times per week to prevent death due to sub-optimal food conditions.  
538 The number of surviving adults was recorded on the collection day and then every two days until  
539 all adults had expired. Any adults that were injured/killed or escaped during the experiment were  
540 removed from the counts. Every 20-50 adults were considered a biological replicate when  
541 determining averages, standard error, and survival thresholds.

### 542 **Structural Modeling**

543 A model of dmSMN was generated using HHpred2 (Zimmermann et al., 2018). The template  
544 used was the Tudor domain from human SMN1 (PDB ID 4qq6) (Liu et al.). Figures of the 4qq6  
545 structure and the dmSMN model were rendered in PyMOL [PyMOL The PyMOL Molecular  
546 Graphics System, Version 2.0 Schrödinger, LLC. ]. A dimethylated arginine was placed in the  
547 active site of the 4qq6 and dmSMN structures based on the solution structure of the complex of  
548 human SMN with the dimethylated arginine ligand (PDB ID 4a4e) [PUBMED: 22101937]

### 549 **Statistical Analysis**

550 All graphing and statistical calculations were performed using Prism (Version 8.2.0). All  
551 organismal viability, SMN protein levels (variable temperature and CHX), and temperature



552 switch experiments were analyzed using a two-way ANOVA with Tukey's multiple comparison  
553 test ( $\alpha = 0.05$ ). Larval locomotion was analyzed using unpaired multiple t-tests ( $\alpha = 0.05$ ).  
554 Adult longevity at 10<sup>th</sup> percentile was analyzed using a two-way ANOVA with Sidak's multiple  
555 comparisons test ( $\alpha = 0.05$ ). The 25°C vs. 29°C relative survival was analyzed using ordinary  
556 one-way ANOVA with Dunnett's multiple comparisons test ( $\alpha = 0.05$ ). The 22°C vs. 29°C  
557 relative survival was analyzed using Welch's t-test ( $\alpha = 0.05$ ). In all graphs, error bars are  
558 expressed as the mean $\pm$ 95% c.i.

559

## 560 **Acknowledgements**

561 The authors are grateful to Dr. Brenda Temple and the R.L. Juliano Structural Bioinformatics  
562 Core facility at UNC-Chapel Hill for their expertise in protein structural modeling. We would also  
563 like to thank Dr. Joe Pearson for help with the developmental chromatin accessibility and gene  
564 expression profiling of the *Smn* locus. Finally, we would like to thank Drs. Harmony Salzler and  
565 Casey Schmidt for detailed editing of the manuscript.

566

## 567 **Competing Interests**

568 The authors declare no competing or financial interests.

569

## 570 **Funding**

571 Funding for this project was provided by the US National Institutes of Health (NIGMS R01-  
572 GM118636; to AGM). ASM was supported by a Seeding Postdoctoral Innovators in Research  
573 and Education (SPIRE) fellowship from the National Institutes of Health (NIGMS K12-  
574 GM000678; to D.T. Lysle).

575

576 **Author contributions**

577 Conceptualization: ACR, ASM, AGM

578 Methodology: ACR, ASM, AGM

579 Formal analysis: ACR

580 Investigation: ACR, SSS, MRE, TPD, VV, ASM

581 Resources: AGM

582 Writing – original draft: ACR

583 Writing – review & editing: ACR, ASM, AGM

584 Visualization: ACR, AGM

585 Supervision: ACR, AGM

586 Project administration: AGM

587 Funding acquisition: AGM

588

589

590 **References**

591 **Ahmad, S., Bhatia, K., Kannan, A. and Gangwani, L.** (2016). Molecular Mechanisms of  
592 Neurodegeneration in Spinal Muscular Atrophy. *J. Exp. Neurosci.* **10**, 39–49.

593 **Alatorre-Jiménez, M., Sánchez-Luna, J., González-Renovato, E., Sánchez-López, A.,**  
594 **Sánchez-Luna, S., Hernández-Navarro, V., Pacheco-Moises, F. and Ortiz, G.**  
595 (2015). Spinal Muscular Atrophy: Review of a Child Onset Disease. *Br. J. Med. Med. Res.*  
596 **6**, 647–660.

597 **Brahms, H., Meheus, L., De Brabandere, V., Fischer, U. and Lührmann, R.** (2001).  
598 Symmetrical dimethylation of arginine residues in spliceosomal Sm protein B/B' and  
599 the Sm-like protein LSm4, and their interaction with the SMN protein. *Rna* **7**, 1531–  
600 1542.

601 **Briese, M., Esmaili, B. and Sattelle, D. B.** (2005). Is spinal muscular atrophy the result of  
602 defects in motor neuron processes? *BioEssays* **27**, 946–957.

603 **Brooks, D. S., Vishal, K., Kawakami, J., Bouyain, S. and Geisbrecht, E. R.** (2016).  
604 Optimization of wrMTrck to monitor Drosophila larval locomotor activity. *J. Insect*  
605 *Physiol.* **93–94**, 11–17.

606 **Bühler, D., Raker, V., Lührmann, R. and Fischer, U.** (1999). Essential role for the tudor  
607 domain of SMN in spliceosomal U snRNP assembly: Implications for spinal muscular  
608 atrophy. *Hum. Mol. Genet.* **8**, 2351–2357.

609 **Butchbach, M. E. R.** (2016). Copy Number Variations in the Survival Motor Neuron Genes:  
610 Implications for Spinal Muscular Atrophy and Other Neurodegenerative Diseases.  
611 *Front. Mol. Biosci.* **3**, 1–10.

612 **Carpten, J., DiDonato, C., Ingraham, S., Wagner-McPherson, C., Nieuwenhuijsen, B.,**

- 613 **Wasmuth, J. and Burghes, A.** (1994). A YAC Contig of the Region Containing the  
614 Spinal Muscular Atrophy Gene (SMA): Identification of an Unstable Region. *Genomics*  
615 **24**, 351–356.
- 616 **Casas-Vila, N., Bluhm, A., Sayols, S., Dinges, N., Dejung, M., Altenhein, T., Kappei, D.,**  
617 **Altenhein, B., Roignant, J. Y. and Butter, F.** (2017). The developmental proteome of  
618 *Drosophila melanogaster*. *Genome Res.* **27**, 1273–1285.
- 619 **Chang, H. C. H., Dimlich, D. N., Yokokura, T., Mukherjee, A., Kankel, M. W., Sen, A.,**  
620 **Sridhar, V., Fulga, T. a., Hart, A. C., Van Vactor, D., et al.** (2008). Modeling spinal  
621 muscular atrophy in *Drosophila*. *PLoS One* **3**, 1–18.
- 622 **Chaytow, H., Huang, Y. T., Gillingwater, T. H. and Faller, K. M. E.** (2018). The role of  
623 survival motor neuron protein (SMN) in protein homeostasis. *Cell. Mol. Life Sci.* **75**,  
624 3877–3894.
- 625 **Cho, S. and Dreyfuss, G.** (2010). A degron created by SMN2 exon 7 skipping is a principal  
626 contributor to spinal muscular atrophy severity. *Genes Dev.* **24**, 438–442.
- 627 **Coovert, D. D., Le, T. T., McAndrew, P. E., Strasswimmer, J., Crawford, T. O., Mendell, J.**  
628 **R., Coulson, S. E., Androphy, E. J., Prior, T. W. and Burghes, A. H. M.** (1997). The  
629 survival motor neuron protein in spinal muscular atrophy. *Hum. Mol. Genet.* **6**, 1205–  
630 1214.
- 631 **Courseaux, A., Richard, F., Grosgeorge, J., Ortola, C., Viale, A., Turc-Carel, C.,**  
632 **Dutrillaux, B., Gaudray, P. and Nahon, J. L.** (2003). Segmental duplications in  
633 euchromatic regions of human chromosome 5: A source of evolutionary instability  
634 and transcriptional innovation. *Genome Res.* **13**, 369–381.
- 635 **Crawford, T. O. and Pardo, C. A.** (1996). The Neurobiology of Childhood Spinal Muscular

- 636 Atrophy. **110**, 97–110.
- 637 **Deguisse, M. O. and Kothary, R.** (2017). New insights into SMA pathogenesis: immune  
638 dysfunction and neuroinflammation. *Ann. Clin. Transl. Neurol.* **4**, 522–530.
- 639 **Deliu, L. P., Ghosh, A. and Grewal, S. S.** (2017). Investigation of protein synthesis in  
640 *Drosophila* larvae using puromycin labelling. *Biol. Open* **6**, 1229–1234.
- 641 **Farrar, M. A., Park, S. B., Vucic, S., Carey, K. A., Turner, B. J., Gillingwater, T. H.,**  
642 **Swoboda, K. J. and Kiernan, M. C.** (2017). Emerging therapies and challenges in  
643 spinal muscular atrophy. *Ann. Neurol.* **81**, 355–368.
- 644 **Feldkötter, M., Schwarzer, V., Wirth, R., Wienker, T. F. and Wirth, B.** (2002).  
645 Quantitative analyses of SMN1 and SMN2 based on real-time lightCycler PCR: fast and  
646 highly reliable carrier testing and prediction of severity of spinal muscular atrophy.  
647 *Am. J. Hum. Genet.* **70**, 358–368.
- 648 **Garcia, E. L., Lu, Z., Meers, M. P., Praveen, K. and Matera, a G.** (2013). Developmental  
649 arrest of *Drosophila* survival motor neuron (Smn) mutants accounts for differences in  
650 expression of minor intron-containing genes. *RNA* **19**, 1510–6.
- 651 **Garcia, E. L., Wen, Y., Praveen, K. and Matera, A. G.** (2016). Transcriptomic comparison  
652 of *Drosophila* snRNP biogenesis mutants reveals mutant-specific changes in pre-  
653 mRNA processing: implications for spinal muscular atrophy. *RNA* 1–13.
- 654 **Gidaro, T. and Servais, L.** (2019). Nusinersen treatment of spinal muscular atrophy:  
655 current knowledge and existing gaps. *Dev. Med. Child Neurol.* **61**, 19–24.
- 656 **Gonsalvez, G. B., Tian, L., Ospina, J. K., Boisvert, F. M., Lamond, A. I. and Matera, A. G.**  
657 (2007). Two distinct arginine methyltransferases are required for biogenesis of Sm-  
658 class ribonucleoproteins. *J. Cell Biol.* **178**, 733–740.

- 659 **Gonsalvez, G. B., Praveen, K., Hicks, A. J., Tian, L. and Matera, A. G.** (2008). Sm protein  
660 methylation is dispensable for snRNP assembly in *Drosophila melanogaster*. *Rna* **14**,  
661 878–887.
- 662 **Govoni, A., Gagliardi, D., Comi, G. P. and Corti, S.** (2018). Time Is Motor Neuron:  
663 Therapeutic Window and Its Correlation with Pathogenetic Mechanisms in Spinal  
664 Muscular Atrophy. *Mol. Neurobiol.* **55**, 6307–6318.
- 665 **Graveley, B. R., Brooks, A. N., Carlson, J. W., Duff, M. O., Landolin, J. M., Yang, L.,**  
666 **Artieri, C. G., Van Baren, M. J., Boley, N., Booth, B. W., et al.** (2011). The  
667 developmental transcriptome of *Drosophila melanogaster*. *Nature* **471**, 473–479.
- 668 **Gray, K. M., Kaifer, K. A., Baillat, D., Wen, Y., Ebert, A. D., Gupta, K., Matera, A. G.,**  
669 **Lamond, A. I., Wagner, E. J., Raimer, A. C., et al.** (2018). Self-oligomerization  
670 regulates stability of survival motor neuron protein isoforms by sequestering an SCF  
671 Slmb degron. *Mol. Biol. Cell* **29**, 96–110.
- 672 **Hossain, S. and Hosen, M. I.** (2019). Dissecting the structural and functional impact of  
673 SNPs located in the spinal muscular atrophy associated gene SMN1 using in silico  
674 analysis. *Gene Reports* **15**, 100388.
- 675 **Jablonka, S. and Sendtner, M.** (2017). Developmental regulation of SMN expression:  
676 Pathophysiological implications and perspectives for therapy development in spinal  
677 muscular atrophy. *Gene Ther.* **24**, 506–513.
- 678 **Kotani, T., Sutomo, R., Sasongko, T. H., Sadewa, A. H., Gunadi, Minato, T., Fujii, E.,**  
679 **Endo, S., Lee, M. J., Ayaki, H., et al.** (2007). A novel mutation at the N-terminal of  
680 SMN Tudor domain inhibits its interaction with target proteins. *J. Neurol.* **254**, 624–  
681 630.

- 682 **Lee, L., Davies, S. E. and Liu, J. L.** (2009). The spinal muscular atrophy protein SMN  
683 affects *Drosophila* germline nuclear organization through the U body-P body pathway.  
684 *Dev. Biol.* **332**, 142–155.
- 685 **Lefebvre, S., Bürglen, L., Reboullet, S., Clermont, O., Burlet, P., Viollet, L., Benichou, B.,**  
686 **Cruaud, C., Millasseau, P., Zeviani, M., et al.** (1995). Identification and  
687 characterization of a spinal muscular atrophy-determining gene. *Cell* **80**, 155–165.
- 688 **Lefebvre, S., Burlet, P., Liu, Q., Bertrand, S., Clermont, O., Munnich, A., Dreyfuss, G.**  
689 **and Melki, J.** (1997). Correlation between severity and SMN protein level in spinal  
690 muscular atrophy. *Nat. Genet.* **16**, 265–269.
- 691 **Li, W.** (2017). How do SMA-linked mutations of SMN1 lead to structural/functional  
692 deficiency of the SMA protein? *PLoS One* **12**, 1–13.
- 693 **Li, D. K., Tisdale, S., Lotti, F. and Pellizzoni, L.** (2014). SMN control of RNP assembly:  
694 From post-transcriptional gene regulation to motor neuron disease. *Semin. Cell Dev.*  
695 *Biol.* 1–8.
- 696 **Liu, Y., Tempel, W., Iqbal, A., Walker, J. R., Bountra, C., Arrowsmith, C. H., Edwards, A.**  
697 **M., Brown, P. J., Min, J. and (SGC), S. G. C.** Crystal Structure of tudor domain of SMN1  
698 in complex with a small organic molecule. *TO BE Publ.*
- 699 **Lorson, C. L., Strasswimmer, J., Yao, J., Baleja, J. D., Hahnen, E., Wirth, B., Le, T.,**  
700 **Burghes, A. H. M. and Androphy, E. J.** (1998). SMN oligomerization defect correlates  
701 with spinal muscular atrophy severity. *Nat. Genet.* **19**, 63–66.
- 702 **Lorson, C. L., Hahnen, E., Androphy, E. J. and Wirth, B.** (1999). A single nucleotide in the  
703 SMN gene regulates splicing and is responsible for spinal muscular atrophy. *Proc.*  
704 *Natl. Acad. Sci.* **96**, 6307–6311.

- 705 **Matera, a. G. and Wang, Z.** (2014). A day in the life of the spliceosome. *Nat. Rev. Mol. Cell*  
706 *Biol.* **15**, 108–121.
- 707 **McKay, D. J. and Lieb, J. D.** (2013). A Common Set of DNA Regulatory Elements Shapes  
708 *Drosophila* Appendages. *Dev. Cell* **27**, 306–318.
- 709 **Meister, G., Bühler, D., Pillai, R., Lottspeich, F. and Fischer, U.** (2001). A multiprotein  
710 complex mediates the ATP-dependent assembly of spliceosomal U snRNPs. *Nat. Cell*  
711 *Biol.* **3**, 945–949.
- 712 **O’Hern, P. j, Garcia, E. L., Hao, L. T., Hart, A. C., Matera, A. G. and Beattie, C. E.** (2017).  
713 Nonmammalian Animal Models of Spinal Muscular Atrophy. In *Spinal Muscular*  
714 *Atrophy: Disease Mechanisms and Therapy* (ed. Sumner, C. J.), Paushkin, S.), and Ko, C.-  
715 P.), pp. 221–239. Elsevier Inc.
- 716 **Pek, J. W., Anand, A. and Kai, T.** (2012). Tudor domain proteins in development.  
717 *Development* **139**, 2255–2266.
- 718 **Pellizzoni, L., Yong, J. and Dreyfuss, G.** (2002). Essential role for the SMN complex in the  
719 specificity of snRNP assembly. *Science (80-. )*, **298**, 1775–1779.
- 720 **Praveen, K., Wen, Y. and Matera, A. G.** (2012). A *Drosophila* Model of Spinal Muscular  
721 Atrophy Uncouples snRNP Biogenesis Functions of Survival Motor Neuron from  
722 Locomotion and Viability Defects. *Cell Rep.* **1**, 624–631.
- 723 **Praveen, K., Wen, Y., Gray, K. M., Noto, J. J., Patlolla, A. R., Van Duyne, G. D. and**  
724 **Matera, a G.** (2014). SMA-Causing Missense Mutations in Survival motor neuron  
725 (Smn) Display a Wide Range of Phenotypes When Modeled in *Drosophila*. *PLoS Genet.*  
726 **10**, e1004489.
- 727 **Prior, T. W., Snyder, P. J., Rink, B. D., Pearl, D. K., Pyatt, R. E., Mihal, D. C., Conlan, T.,**



- 728 **Schmalz, B., Montgomery, L., Ziegler, K., et al.** (2010). Newborn and carrier  
729 screening for spinal muscular atrophy. *Am. J. Med. Genet. A* **152A**, 1608–16.
- 730 **Rajendra, T. K., Gonsalvez, G. B., Walker, M. P., Shpargel, K. B., Salz, H. K. and Matera,**  
731 **A. G.** (2007). A *Drosophila melanogaster* model of spinal muscular atrophy reveals a  
732 function for SMN in striated muscle. *J. Cell Biol.* **176**, 831–841.
- 733 **Ramos, D. M., d'Ydewalle, C., Gabbeta, V., Dakka, A., Klein, S. K., Norris, D. A., Matson,**  
734 **J., Taylor, S. J., Zaworski, P. G., Prior, T. W., et al.** (2019). Age-dependent SMN  
735 expression in disease-relevant tissue and implications for SMA treatment. *J. Clin.*  
736 *Invest.*
- 737 **Sahashi, K., Ling, K. K. Y., Hua, Y., Wilkinson, J. E., Nomakuchi, T., Rigo, F., Hung, G., Xu,**  
738 **D., Jiang, Y. P., Lin, R. Z., et al.** (2013). Pathological impact of SMN2 mis-splicing in  
739 adult SMA mice. *EMBO Mol. Med.* **5**, 1586–1601.
- 740 **Schrank, B., Götz, R., Gunnensen, J. M., Ure, J. M., Toyka, K. V, Smith, A. G. and**  
741 **Sendtner, M.** (1997). Inactivation of the survival motor neuron gene, a candidate  
742 gene for human spinal muscular atrophy, leads to massive cell death in early mouse  
743 embryos. *Proc. Natl. Acad. Sci. U. S. A.* **94**, 9920–5.
- 744 **Shpargel, K. B., Praveen, K., Rajendra, T. K. and Matera, A. G.** (2009). Gemin3 Is an  
745 Essential Gene Required for Larval Motor Function and Pupation in *Drosophila*. *Mol.*  
746 *Biol. Cell* **20**, 90–101.
- 747 **Sneha, P., Zenith, T. U., Abu Habib, U. S., Evangeline, J., Thirumal Kumar, D., George**  
748 **Priya Doss, C., Siva, R. and Zayed, H.** (2018). Impact of missense mutations in  
749 survival motor neuron protein (SMN1) leading to Spinal Muscular Atrophy (SMA): A  
750 computational approach. *Metab. Brain Dis.* **33**, 1823–1834.

- 751 **Spring, A. M., Raimer, A. C., Hamilton, C. D., Schillinger, M. J. and Matera, A. G. (2019).**  
752       Comprehensive Modeling of Spinal Muscular Atrophy in *Drosophila melanogaster*.  
753       *Front. Mol. Neurosci.* **12**, 1–16.
- 754 **Sugarman, E. A., Nagan, N., Zhu, H., Akmaev, V. R., Zhou, Z., Rohlf, E. M., Flynn, K.,**  
755       **Hendrickson, B. C., Scholl, T., Sirko-Osadsa, D. A., et al. (2012).** Pan-ethnic carrier  
756       screening and prenatal diagnosis for spinal muscular atrophy: clinical laboratory  
757       analysis of >72 400 specimens. *Eur. J. Hum. Genet.* **20**, 27–32.
- 758 **Sumner, C. J. and Crawford, T. O. (2018).** Two breakthrough gene-targeted treatments  
759       for spinal muscular atrophy: Challenges remain. *J. Clin. Invest.* **128**, 3219–3227.
- 760 **Takarada, T., Ar Rochmah, M., Harahap, N. I. F., Shinohara, M., Saito, T., Saito, K., Lai,**  
761       **P. S., Bouike, Y., Takeshima, Y., Awano, H., et al. (2017).** SMA mutations in SMN  
762       Tudor and C-terminal domains destabilize the protein. *Brain Dev.* **39**, 606–612.
- 763 **Tiziano, F. D., Melki, J., Simard, L. R., Cuore, S. and Medica, G. (2013).** Solving the Puzzle  
764       of Spinal Muscular Atrophy : What Are the Missing Pieces ? 2836–2845.
- 765 **Tripsianes, K., Madl, T., Machyna, M., Fessas, D., Englbrecht, C., Fischer, U.,**  
766       **Neugebauer, K. M. and Sattler, M. (2011).** Structural basis for dimethylarginine  
767       recognition by the Tudor domains of human SMN and SPF30 proteins. *Nat. Struct. Mol.*  
768       *Biol.* **18**, 1414–1420.
- 769 **Velasco, E., Valero, C., Valero, A., Moreno, F. and Hernandez-Chico, C. (1996).**  
770       Molecular analysis of the SMN and NAIP genes in Spanish spinal muscular atrophy  
771       (SMA) families and correlation between number of copies of (C)BCD541 and SMA  
772       phenotype. *Hum. Mol. Genet.* **5**, 257–263.
- 773 **Vill, K., Kölbel, H., Schwartz, O., Blaschek, A., Olgemöller, B., Harms, E., Burggraf, S.,**

774        **Röschinger, W., Durner, J., Gläser, D., et al.** (2019). One year of newborn screening  
775        for SMA – Results of a German pilot project. *J. Neuromuscul. Dis.* 1–13.

776        **Wirth, B.** (2000). An update of the mutation spectrum of the survival motor neuron gene  
777        (SMN1) in autosomal recessive spinal muscular atrophy (SMA). *Hum. Mutat.* **15**, 228–  
778        237.

779        **Zimmermann, L., Stephens, A., Nam, S. Z., Rau, D., Kübler, J., Lozajic, M., Gabler, F.,**  
780        **Söding, J., Lupas, A. N. and Alva, V.** (2018). A Completely Reimplemented MPI  
781        Bioinformatics Toolkit with a New HHpred Server at its Core. *J. Mol. Biol.* **430**, 2237–  
782        2243.

783

784 **Fig. 1. Effects of temperature limits on viability of SMN patient-derived missense mutant**  
785 **lines.** (A) Diagram of the SMN protein showing orthologous SMA patient-derived missense  
786 mutations in the *Drosophila* SMN protein sequence. This schematic represents our *Drosophila*  
787 SMN transgene construct, which includes an N-terminal 3X-FLAG tag and a 3kB upstream  
788 sequence that includes the native *Smn* promoter. (B,C) Viability assay of the wildtype and 10 *Smn*  
789 mutant transgenic lines, measured by percentage of larvae reaching the pupal (B) and adult (C)  
790 stages when being raised at either the optimal culturing temperature, 25°C (green), or one of the  
791 extreme temperatures, 18°C (light blue) or 29°C (red). Mutants are separated by the protein  
792 functional domain that they impact (Gemin2, Tudor, YG box). The number of larvae for each  
793 genotype-temperature combination ranges from 100 to 400 larvae. Larvae were split into vials of  
794 ~50 and the viability of each vial was treated as a separate replicate (data points). Error bars  
795 represent mean±95% c.i. Adjusted P-value was calculated using two-way ANOVA and Tukey's  
796 multiple comparisons test. \*p<0.05, \*\*p<0.01, \*\*\*p<0.001.

797  
798 **Fig. 2. Effects of small temperature changes on SMN Tudor mutant viability and locomotor**  
799 **function.** (A,B) Viability assay of flies expressing a wildtype *Smn* transgene, one of four Tudor  
800 domain mutations (F70S, V72G, G73R, and I93F), or a YG box domain mutation (T205I) .  
801 Viability is measured as the percent of larvae that reach the pupal (A) and adult (B) stages while  
802 being raised at either the optimal culturing temperature, 25°C (green), or a slightly colder (22°C,  
803 blue) or slightly warmer (27°C, orange) temperature. The number of larvae for each experimental  
804 group ranges from 150 to 400 larvae. Larvae were split into vials of ~50 and the viability of each  
805 vial was treated as a separate replicate. The 25°C viability data are the same data from Fig. 1C,D  
806 and are included for ease of comparison. Error bars represent mean±95% c.i. Adjusted P-values

807 calculated using Tukey's multiple comparisons test. \* $p < 0.05$ , \*\* $p < 0.01$ , \*\*\* $p < 0.001$ . (C)  
808 Locomotion assays of wandering 3<sup>rd</sup>-instar larvae of the same genotypes as (A) and (B) raised at  
809 22°C (blue) or 27°C (orange). 30-35 larvae were assayed per condition. Locomotion was  
810 measured in body lengths per second (BLPS), which measures the larva's speed in relationship to  
811 its body size. Error bars represent mean $\pm$ 95% c.i. P-values for calculated using student's t-test.  
812 ns: not significant ( $p > 0.05$ ), \*\*  $p < 0.01$ , \*\*\*  $p < 0.001$ .

813

814 **Fig. 3. Effects of small temperature changes on SMN protein levels in Tudor domain**  
815 **mutants.** (A) Representative Western blots of wandering 3<sup>rd</sup>-instar larvae from wildtype, Tudor  
816 domain mutants, and YG box domain mutant (T205I) raised at 22°C (blue), 25°C (green) or 27°C  
817 (orange), 8-12 larvae per sample. Protein was visualized using an HRP-conjugated primary  
818 antibody that recognizes the 3X-FLAG tag on the N-terminus of the SMN transgenic construct.  
819 (B) Quantification of Western blot biological replicates represented in (A). Each sample contained  
820 8-12 wandering 3<sup>rd</sup>-instar larvae, each genotype-temperature combination contains 3 to 5 samples  
821 (30-50 larvae total). Total protein was used as a loading control to standardize SMN levels (see  
822 Fig. S1). SMN levels for each sample were normalized to the "WT 25" SMN protein levels for  
823 their respective replicate. Error bars represent mean $\pm$ 95% c.i. Two-way ANOVA with Tukey post  
824 test yielded no significance.

825

826 **Fig. 4. Cycloheximide experiments measure SMN protein stability in F70S Tudor domain**  
827 **mutants** (A) Schematic of cycloheximide (CHX) experiment, showing treatment types,  
828 timepoints, and treatment temperature (B) Representative Western blots of WT and F70S mutant  
829 wandering 3<sup>rd</sup>-instar larvae in the presence of CHX over 12 hours, 10 dissected larvae per sample.

830 The control treatment contained Schneider's media while the CHX treatment contained  
831 Schneider's media and cycloheximide. All blots show FLAG-SMN levels, total protein used for  
832 standardization not shown. (C) Quantification of Westerns represented in (B), 3-9 samples per  
833 condition. "Control" represents the media only treatment, "CHX" represents the media and  
834 cycloheximide treatment. All SMN protein levels standardized using total protein, and relative to  
835 "0 hour" SMN levels of each genotype. Error bars represent mean±95% c.i. Adjusted P-values  
836 calculated using Tukey's multiple comparisons test. \*\* p<0.01, \*\*\* p<0.001.

837

838 **Fig. 5. Nonpermissive-to-permissive temperature shift viability assays during early larval**  
839 **development.** (A) Proteomic analysis of SMN levels throughout *Drosophila* developmental  
840 stages, data mined from Casas-Vila et al., 2017 via FlyBase (<https://flybase.org/>) (B) FAIRE and  
841 RNAseq analysis of *Drosophila Smn* genomic region over embryonic development and in larval  
842 imaginal discs, data mined from McKay and Lieb, 2013 (C) Transcriptomic analysis of *SMN*  
843 mRNA levels throughout *Drosophila* developmental stages, data mined from Graveley et al.,  
844 2011 via FlyBase (<https://flybase.org/>) (D) Workflow schematic of nonpermissive-to-permissive  
845 temperature shift experiments, switching larvae from 29°C to 22°C at 1 or 2 days post-egg laying  
846 (DPE). (E,F) Pupation (E) and eclosion (F) percentages of wildtype, Tudor domain mutant, and  
847 YG box mutant (T205I) larvae raised exclusively at 22°C (blue), switched from 22°C to 29°C at  
848 L1 stage (yellow), switched from 22°C to 29°C at L2 stage (orange), or raised exclusively at 29°C  
849 (red), 150-350 larvae per genotype, 50 larvae per biological replicate. Error bars represent  
850 mean±95% c.i. Adjusted P-values calculated using Tukey's multiple comparisons test. ns: not  
851 significant (p >0.05), \* p<0.05, \*\* p<0.01, \*\*\* p<0.001).

852

853 **Fig. 6. Permissive-to-nonpermissive temperature shift viability assays during late larval and**  
854 **pupal development.** (A) Workflow schematic of permissive-to-nonpermissive temperature shift  
855 experiments, switching wandering 3<sup>rd</sup>-instar (W3) larvae from 22°C to 29°C. (B,C) Pupation (B)  
856 and eclosion (C) percentages of wildtype, Tudor domain mutant, and YG box mutant (T205I)  
857 larvae raised exclusively at 22°C (blue), switched from 22°C to 29°C at W3 stage (teal), or raised  
858 exclusively at 29°C (red), 150 larvae per genotype, 50 larvae per biological replicate. Error bars  
859 represent mean±95% c.i. Adjusted P-values calculated using two-way ANOVA and Tukey's  
860 multiple comparisons test \* p<0.05, \*\* p<0.01, \*\*\* p<0.001.

861  
862 **Fig. 7. Adult longevity of select SMN Tudor domain mutants at permissive and non-**  
863 **permissive temperatures.** (A,B) Survival plots of WT and Tudor domain mutant adult flies at  
864 (A) 29°C or (B) 25°C. The flies were raised at 25°C (WT, G73R, I93F) or 22°C (F70S) prior to  
865 eclosion and then moved to the experimental temperature <24 hours post-eclosion. The number  
866 of adults for each group range from 150 to 600. Live adults were counted every two days. Error  
867 bars represent mean±95% c.i. WT-black, F70S-green, G73R-purple, I93F-yellow. (C) Average  
868 time to reach 10% survival for adults at 29°C (red) and 25°C (green). Error bars represent  
869 mean±95% c.i. (D) Comparing relative longevity (10% survival 29°C/10% survival 25°C). Error  
870 bars represent mean±95% c.i. (E) Survival plot of WT (black) and F70S mutant (green) adult flies  
871 raised and maintained at 22°C (F) Average time to reach 10% survival for adults raised at 22°C  
872 (blue) and 29°C (red) Error bars represent mean±95% c.i. (G) relative survival (10% survival  
873 29°C/10% survival 22°C). Error bars represent mean±95% c.i. P-values for 10% survival  
874 calculated using two-way ANOVA with Sidak's multiple comparisons test. \*\*\* p<0.001. P-

875 values for longevity ratios calculated using one-way ANOVA and student's t-test. ns: not  
876 significant ( $p > 0.05$ ), \*\*\*  $p < 0.001$ .

877

878 **Figure 8: Structural consequence of SMN Tudor domain mutations.** (A,B) Protein structure  
879 model of *Drosophila* SMN Tudor domain with bound dimethylated arginine (red-white-blue stick,  
880 upper left) (generation of model in Materials and Methods). (A) Wildtype SMN Tudor domain  
881 with residues of interest highlighted by ball-and-stick structures (orange-F70, magenta-V72,  
882 green-G73, blue-I93). (B) Same structure as (A) but with I93F overlay (silver). Steric clash shown  
883 by red circles. This is the most common of four conformations for I93F, but all four conformations  
884 experience steric clash.

885

886 **Supplemental Figure 1: Representative FLAG-SMN Western blot and corresponding total**  
887 **protein UV fluorescence image.** The FLAG-SMN blots are the same as in Figure 3. The total  
888 protein blot below each SMN blot is the same membrane detecting the total protein using UV  
889 fluorescence exposure. The yellow boxes distinguish the subset of four bands that was used in the  
890 quantification/normalization step of all Western blot analyses.

891

892 **Supplemental Figure 2:  $\alpha$ -puromycin western blot in the presence and absence of**  
893 **cycloheximide (CHX).** Western blot of wandering 3<sup>rd</sup>-instar wildtype larvae (10 larvae/sample)  
894 after puromycin treatment with or without CHX (4-hour or 16-hour treatment). Lower panel is  
895 total protein visualized using fluorescence as described in Materials and Methods. Upper panel is  
896 western blot of puromycin, which represents newly translated protein.

897



898 **Supplemental Figure 3: Sex-specific adult longevity.** (A) Survival plots of WT and F70S Tudor  
899 domain mutant adult flies at 29°C (left) or 25°C (right). Number of adults for each genotype-  
900 temperature combination range from 140 to 300. WT survival plots are on top, F70S survival plots  
901 are one bottom. Live adults were counted every two days. Error bars represent standard error.  
902 Combined (Male+Female)-black, Male-blue, Female-yellow. (Left) WT 25°C flies were raised  
903 at 25°C and were shifted to a new vial remaining at 25°C until death; F70S flies were raised at  
904 22°C and shifted to 25°C after eclosion. (Right) WT 29°C flies were raised at 25°C (F70S flies  
905 were raised at 22°C) and then both genotypes were shifted to a new vial at 29°C less than 24h  
906 after eclosion until death (B) Comparing days to 50%, 25%, or 10% survival or less between male  
907 (blue) and female (yellow) adults at 25°C (above) or 29°C (below). Darker bars represent WT  
908 adults, lighter bars represent F70S adults. Error bars represent mean±s.e.m. P-values calculated  
909 using student's t-test (\* p<0.05, \*\* p<0.01, \*\*\* p<0.001).

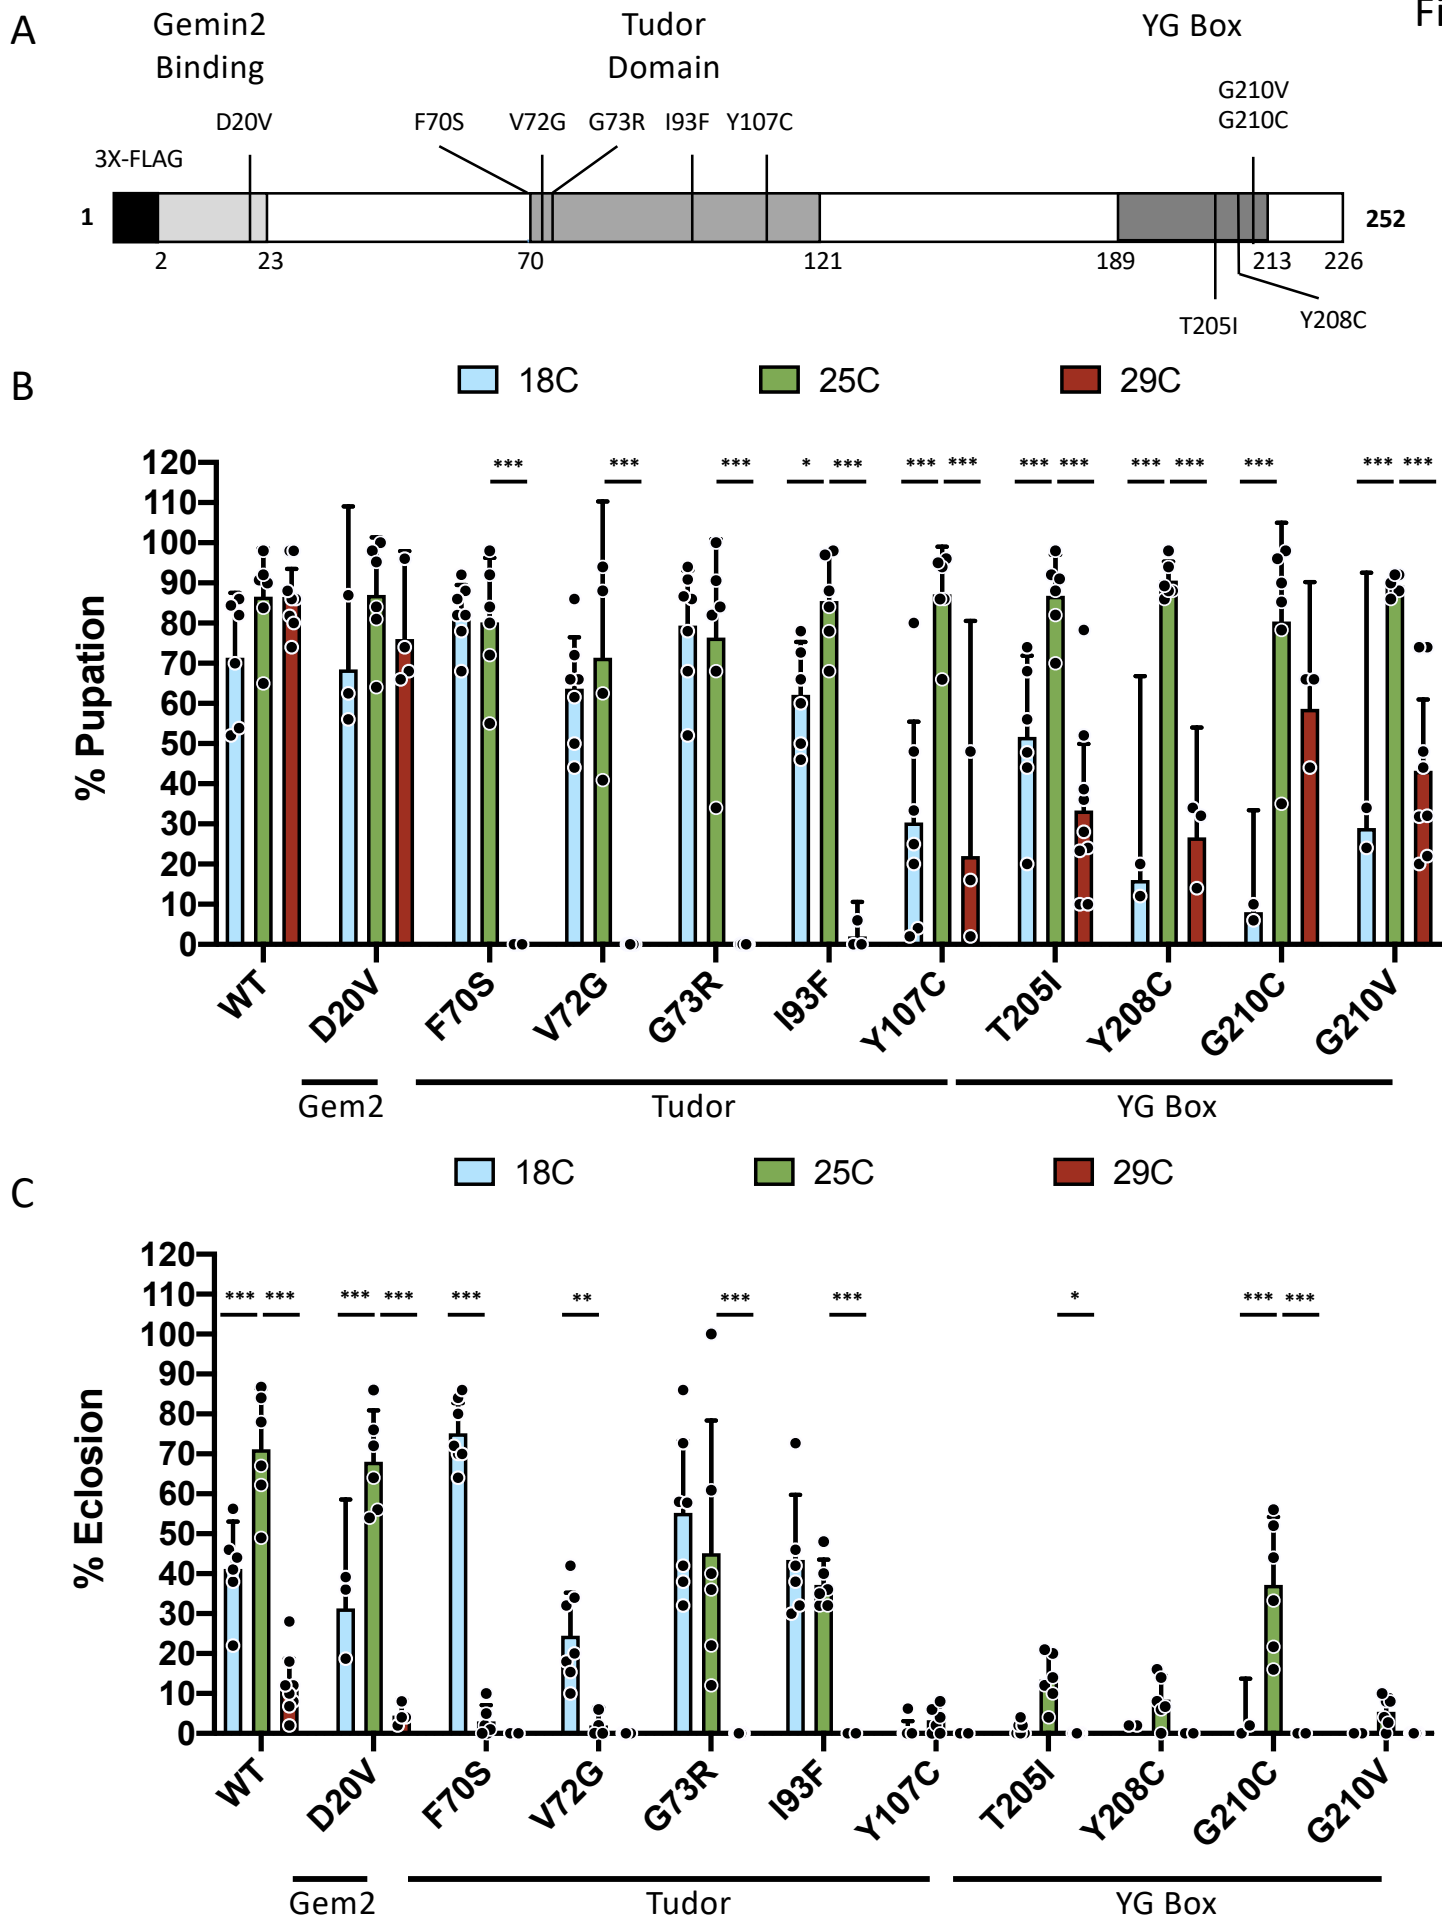

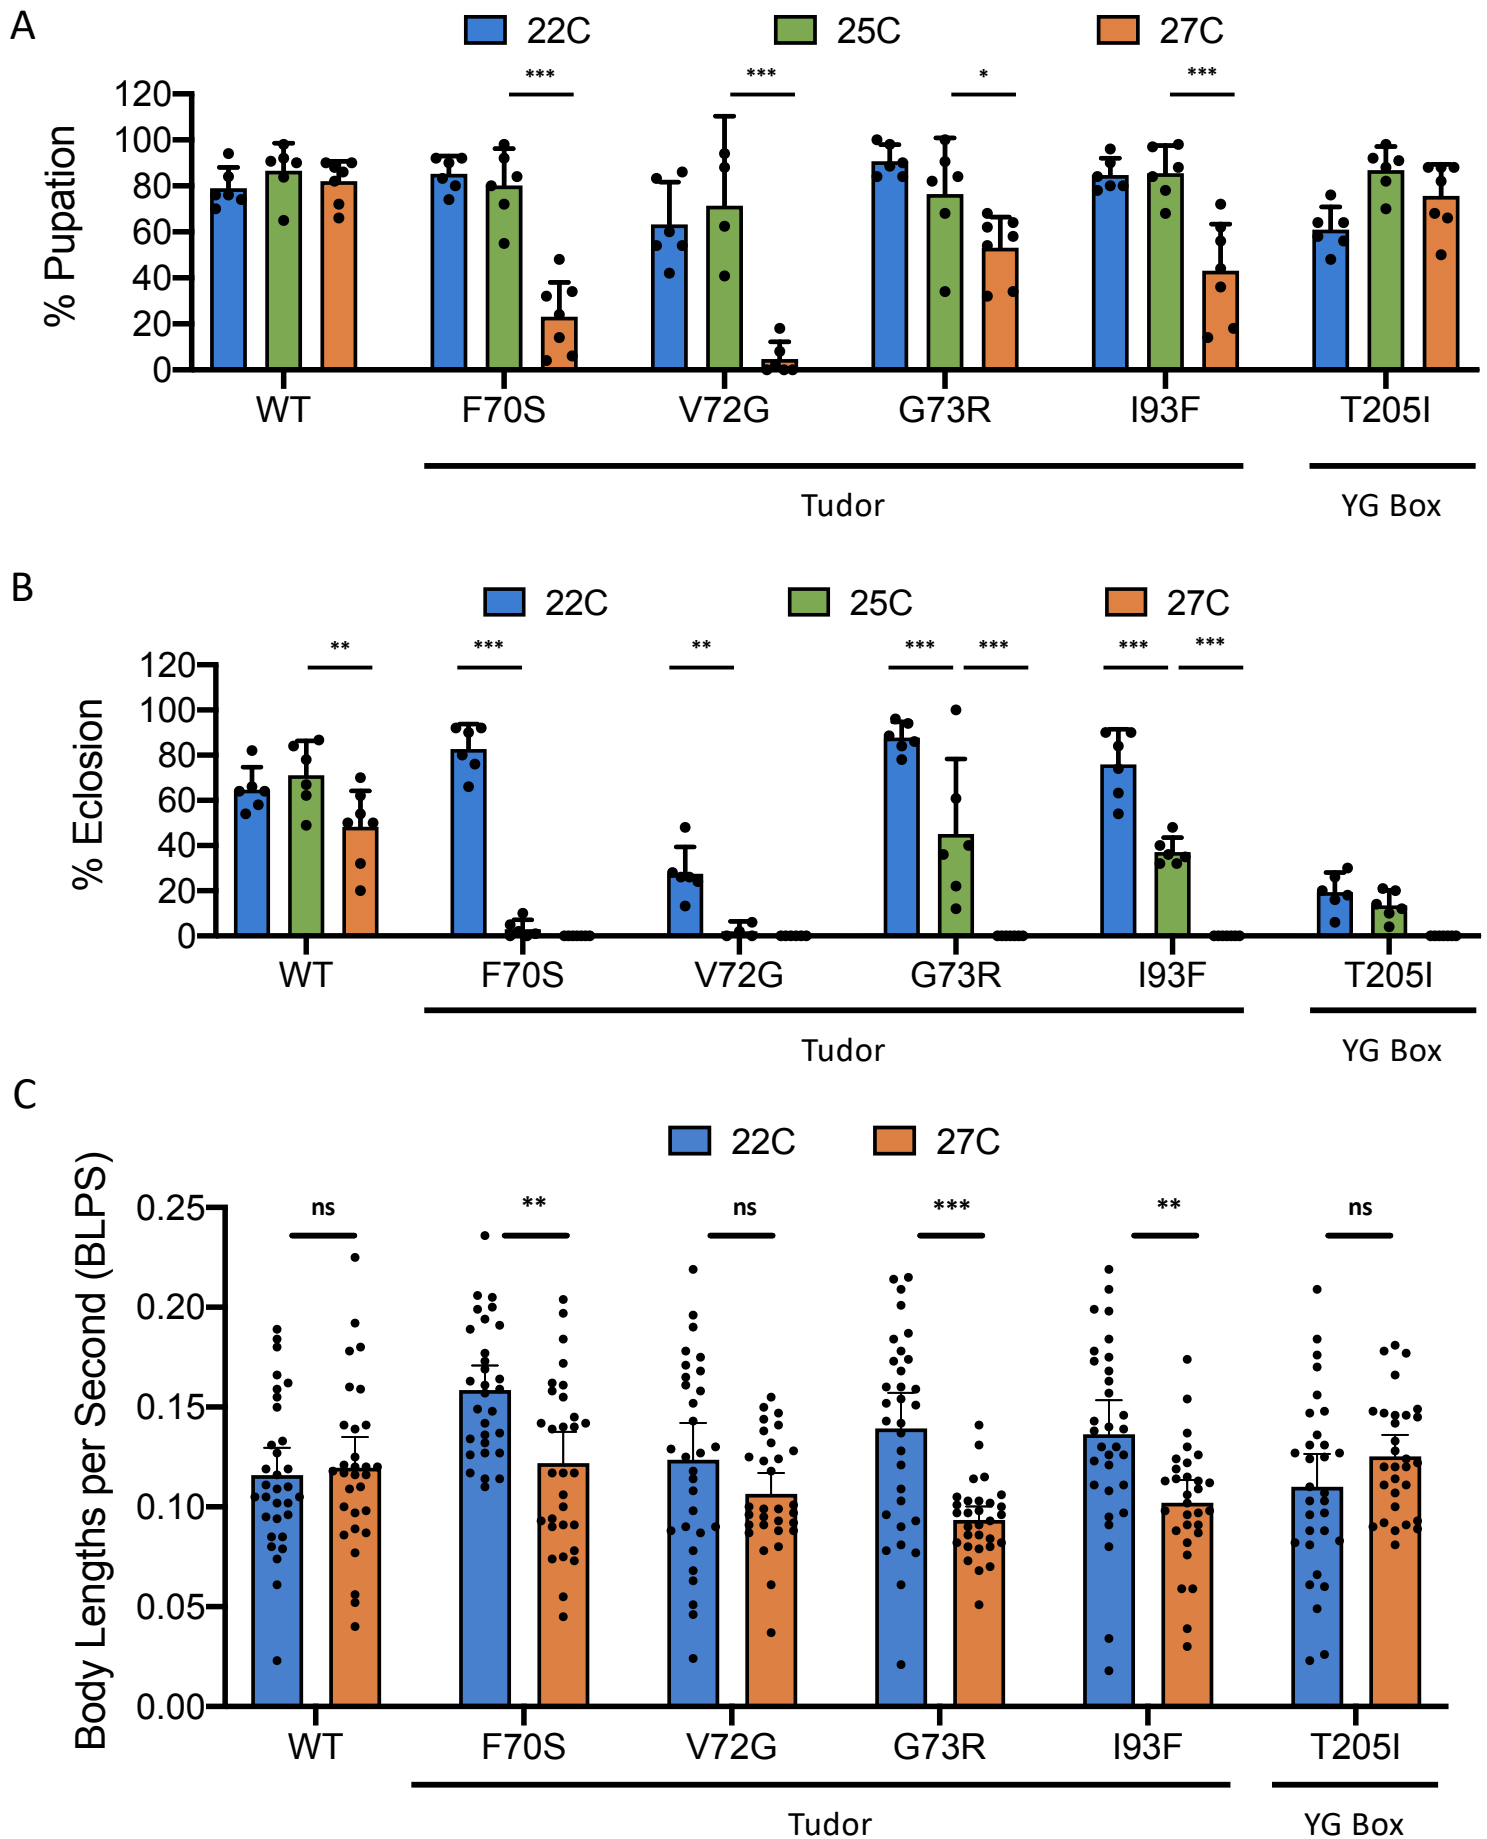

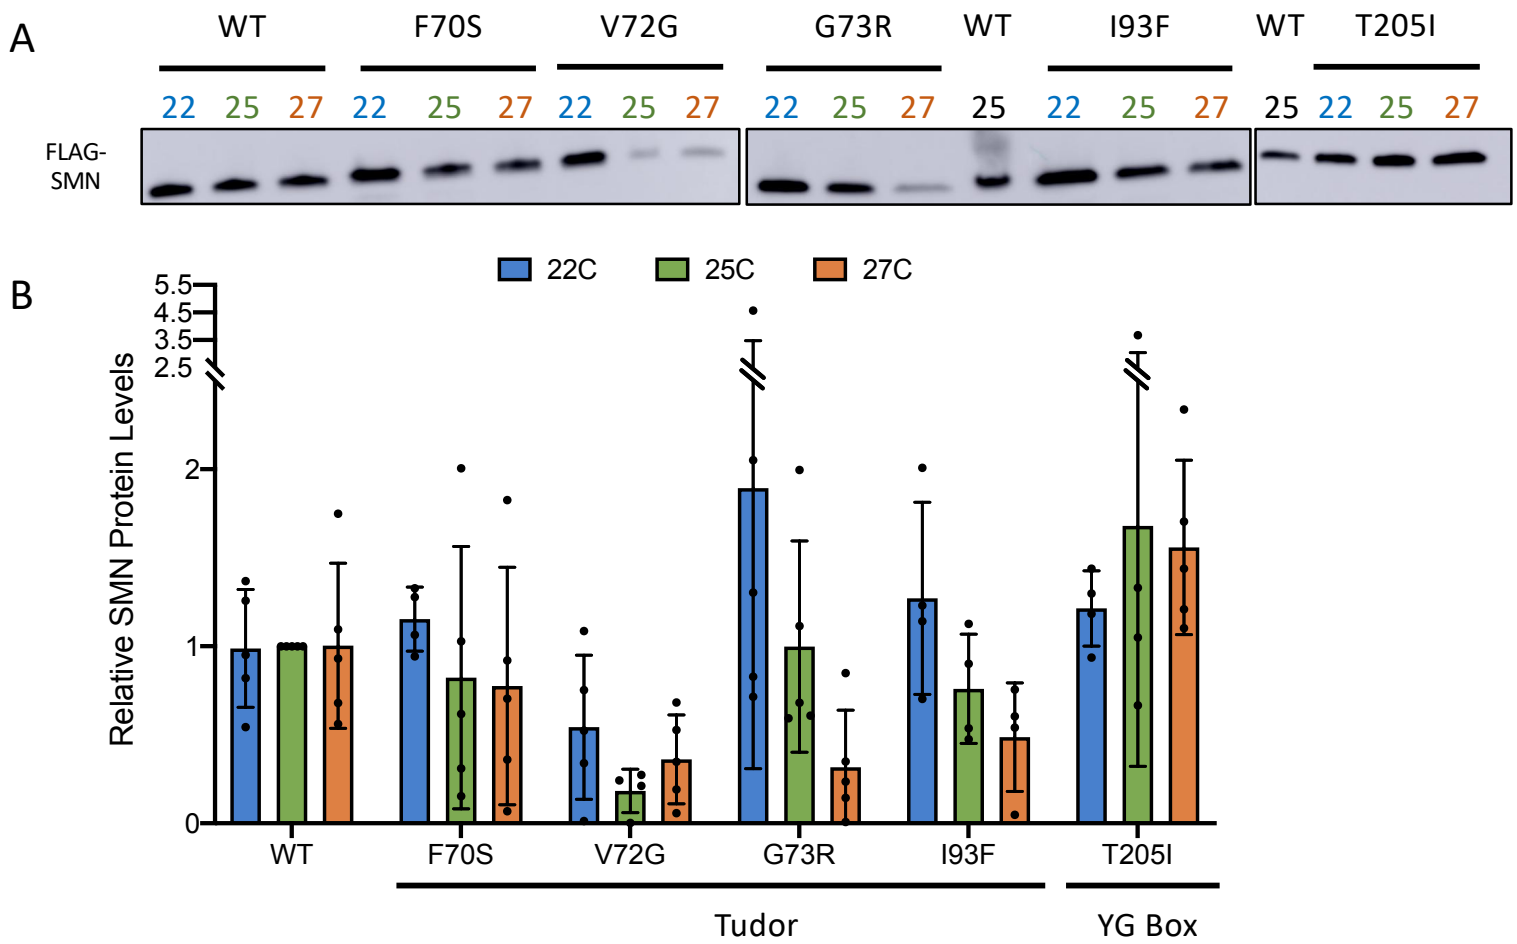

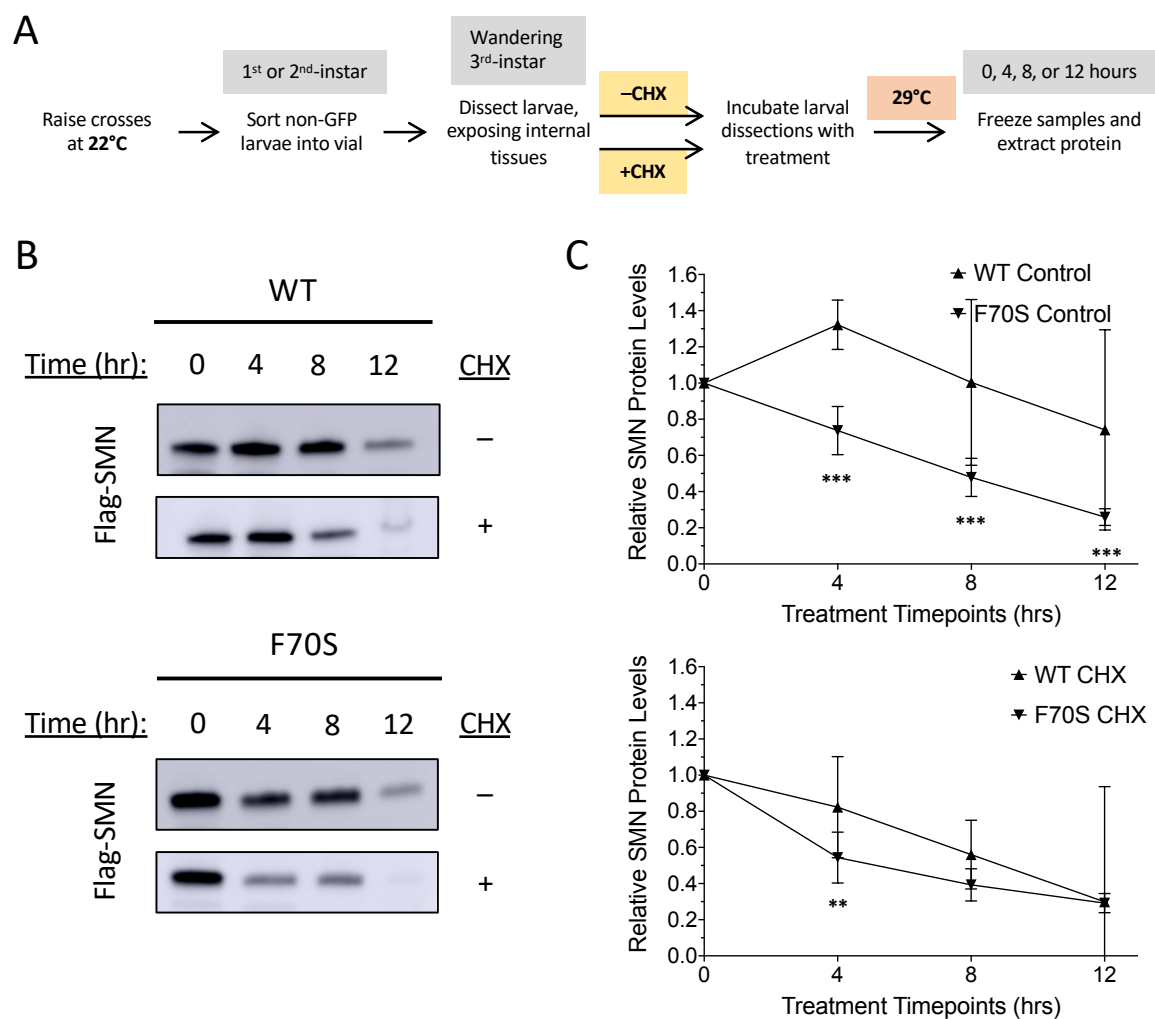

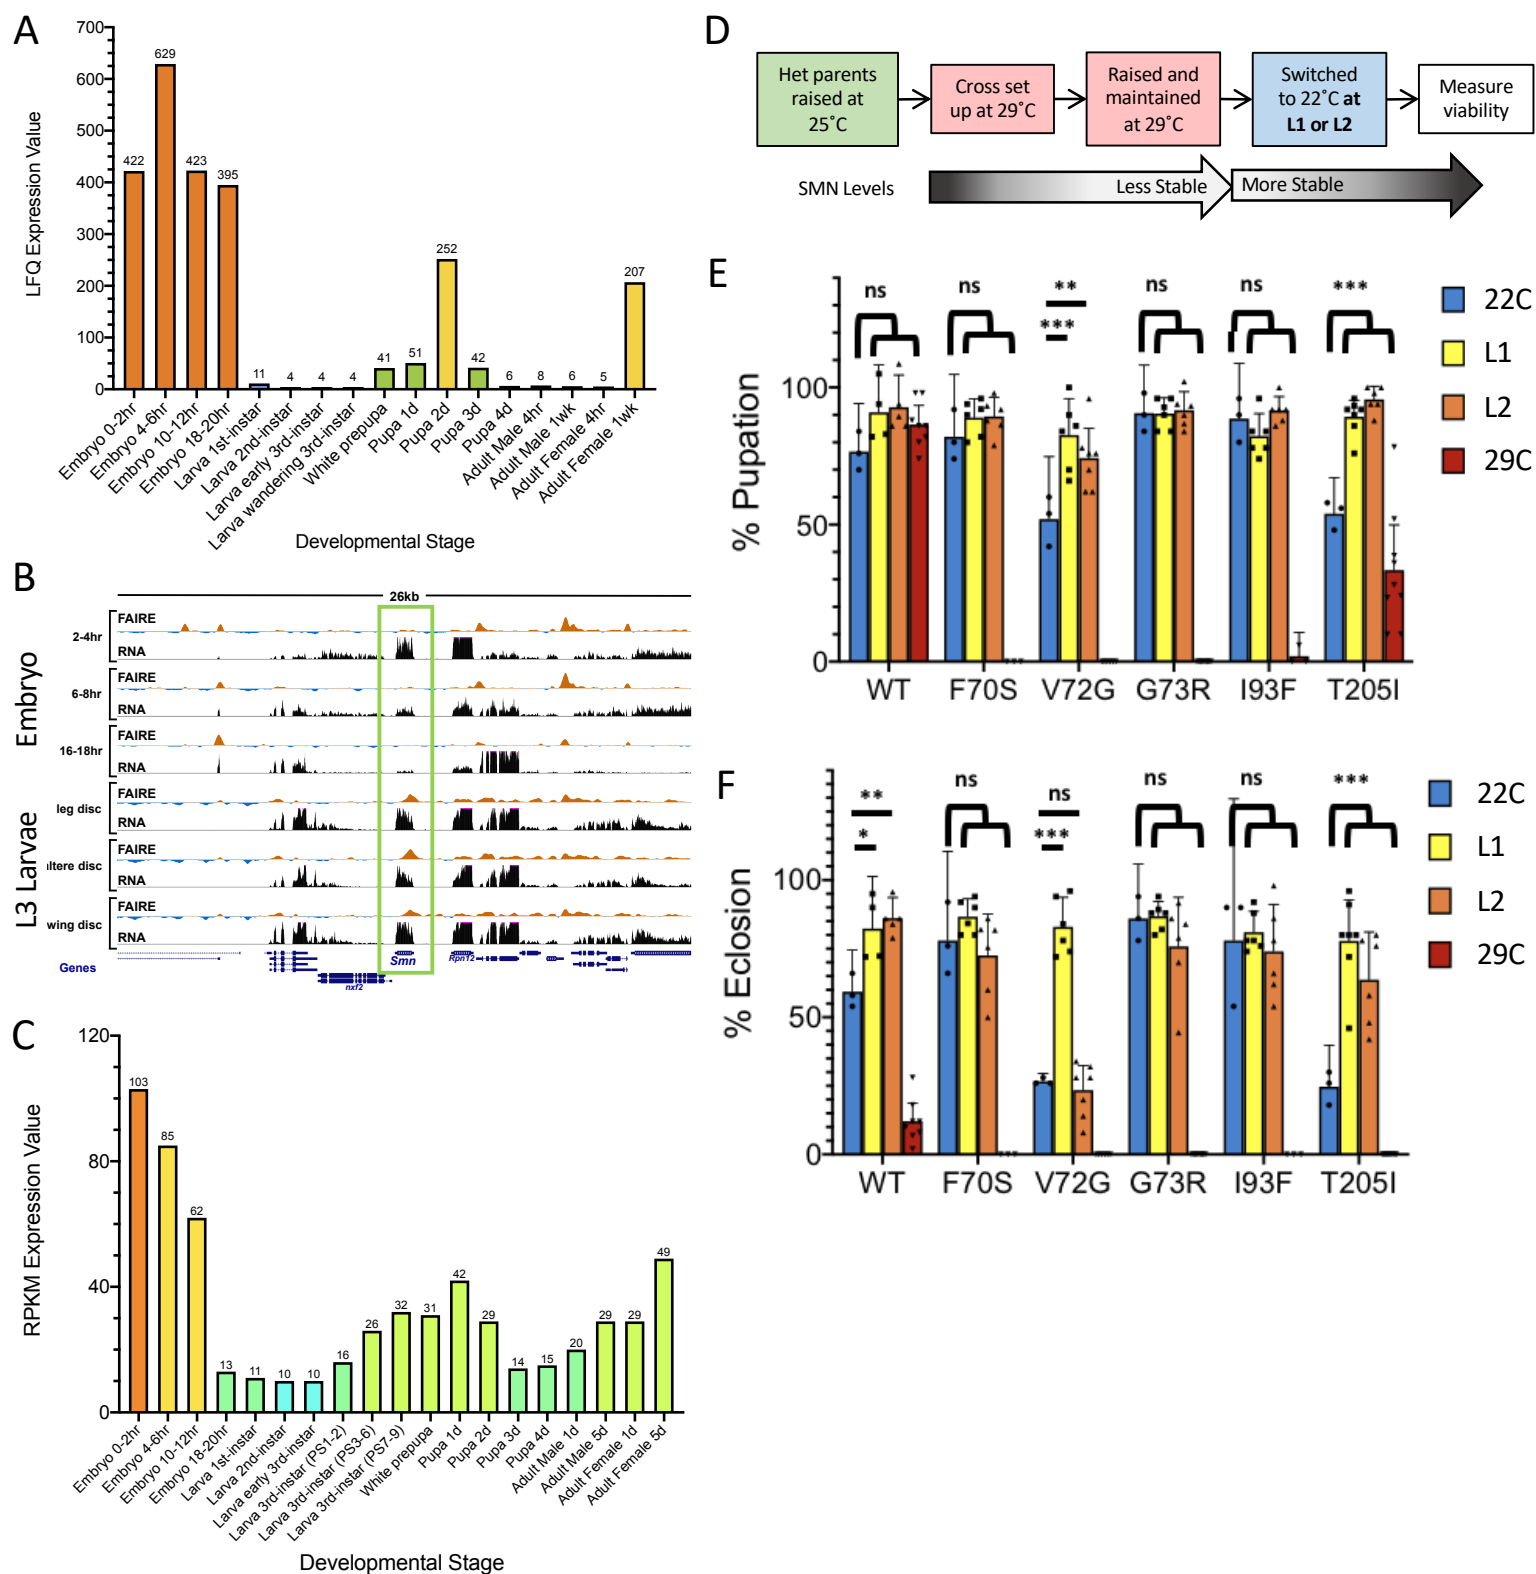

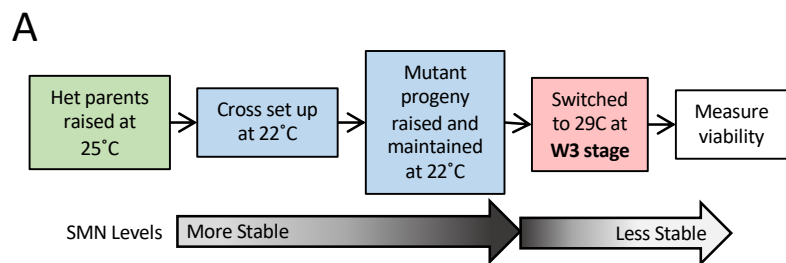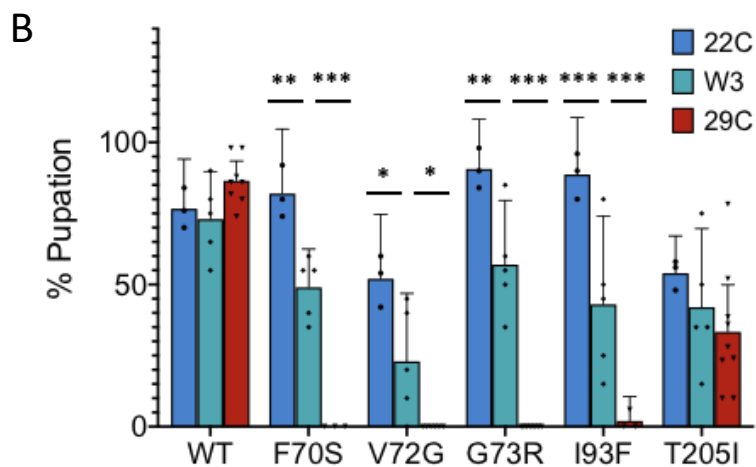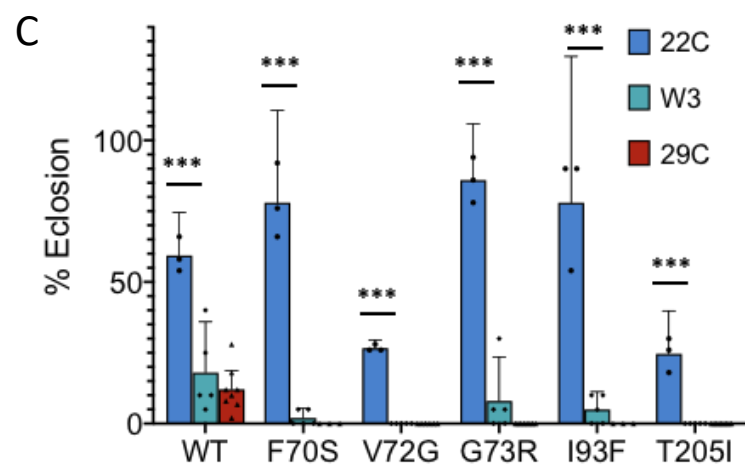

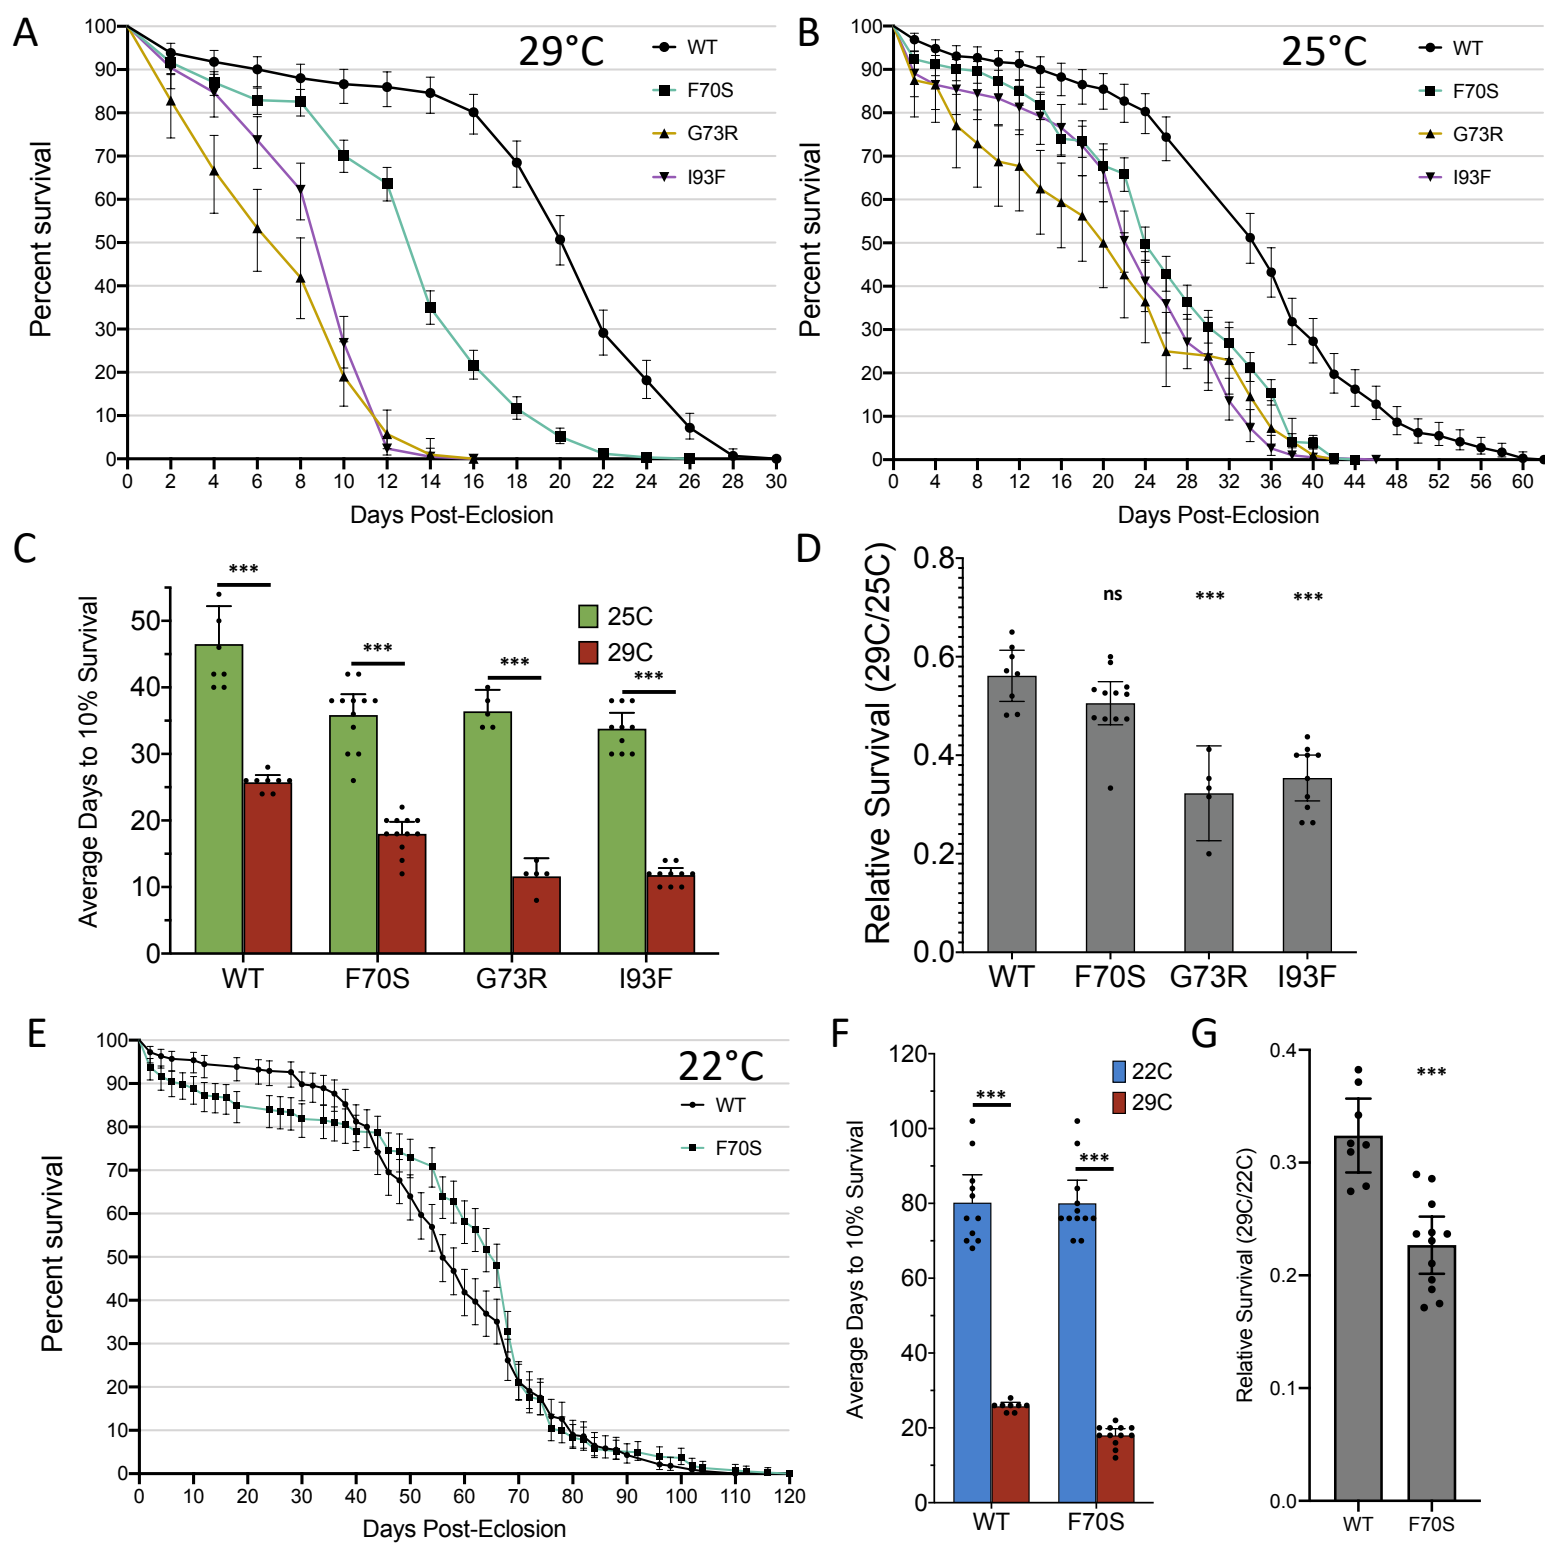



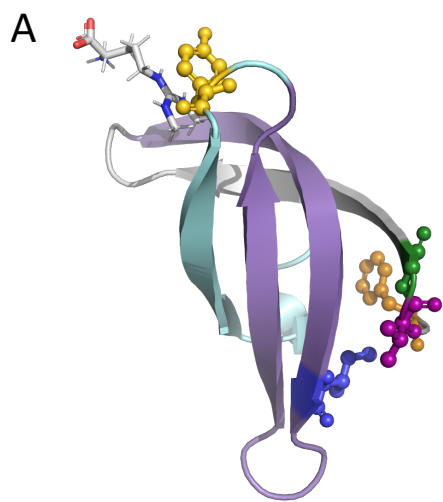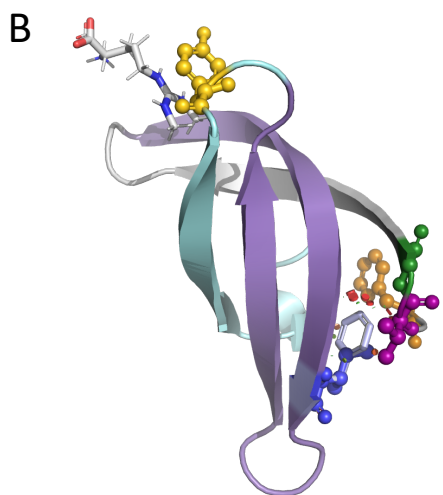

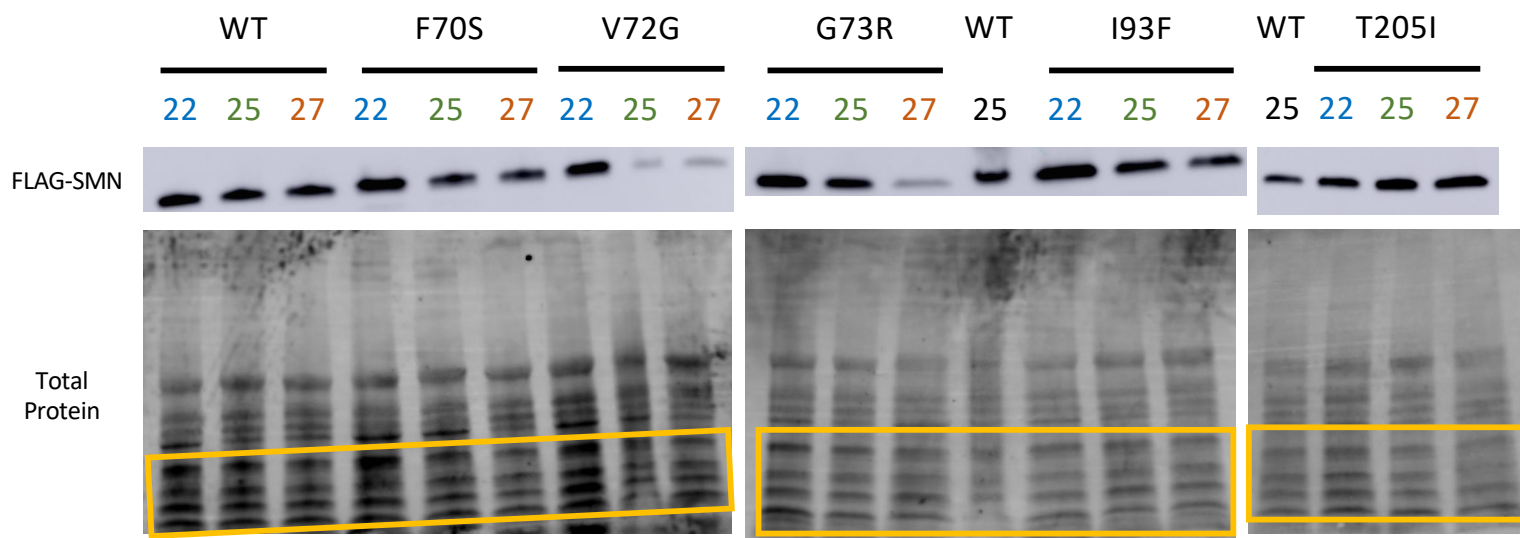

Fig. S1

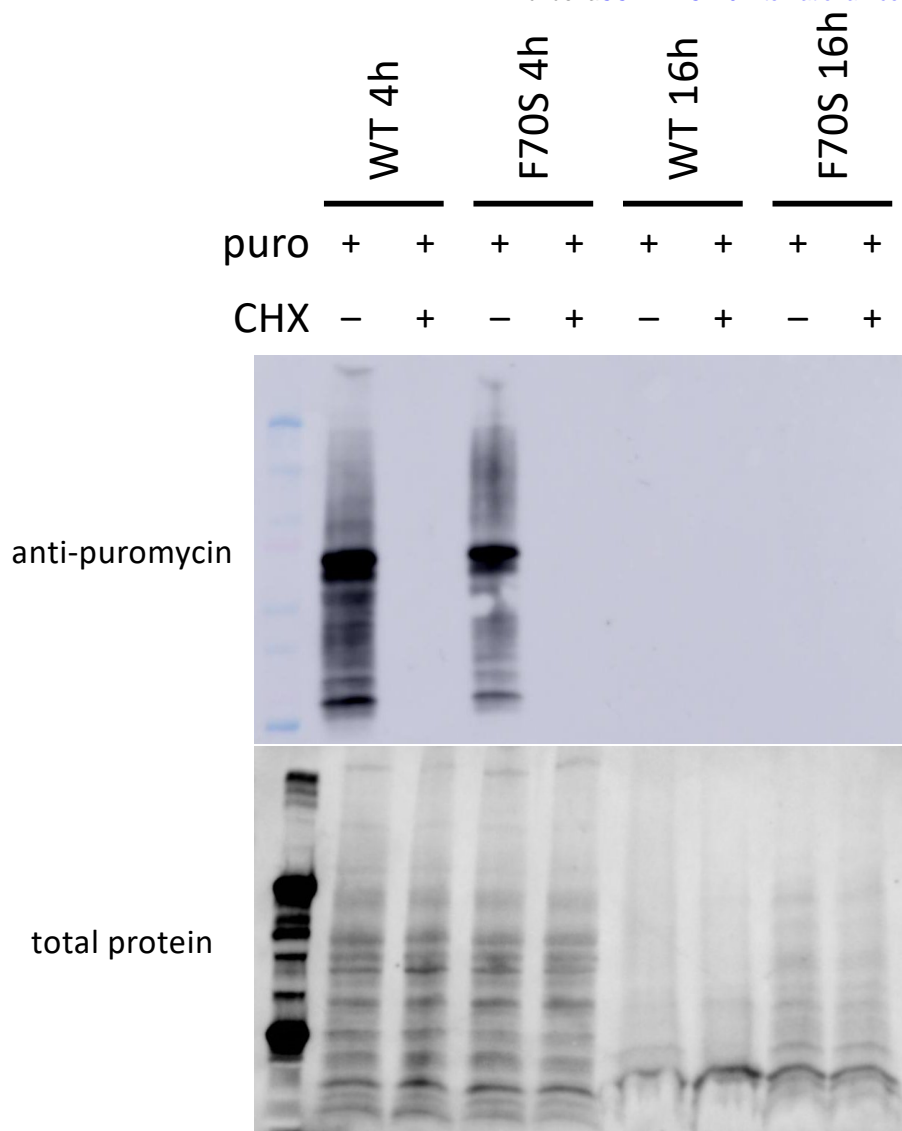

Fig. S2

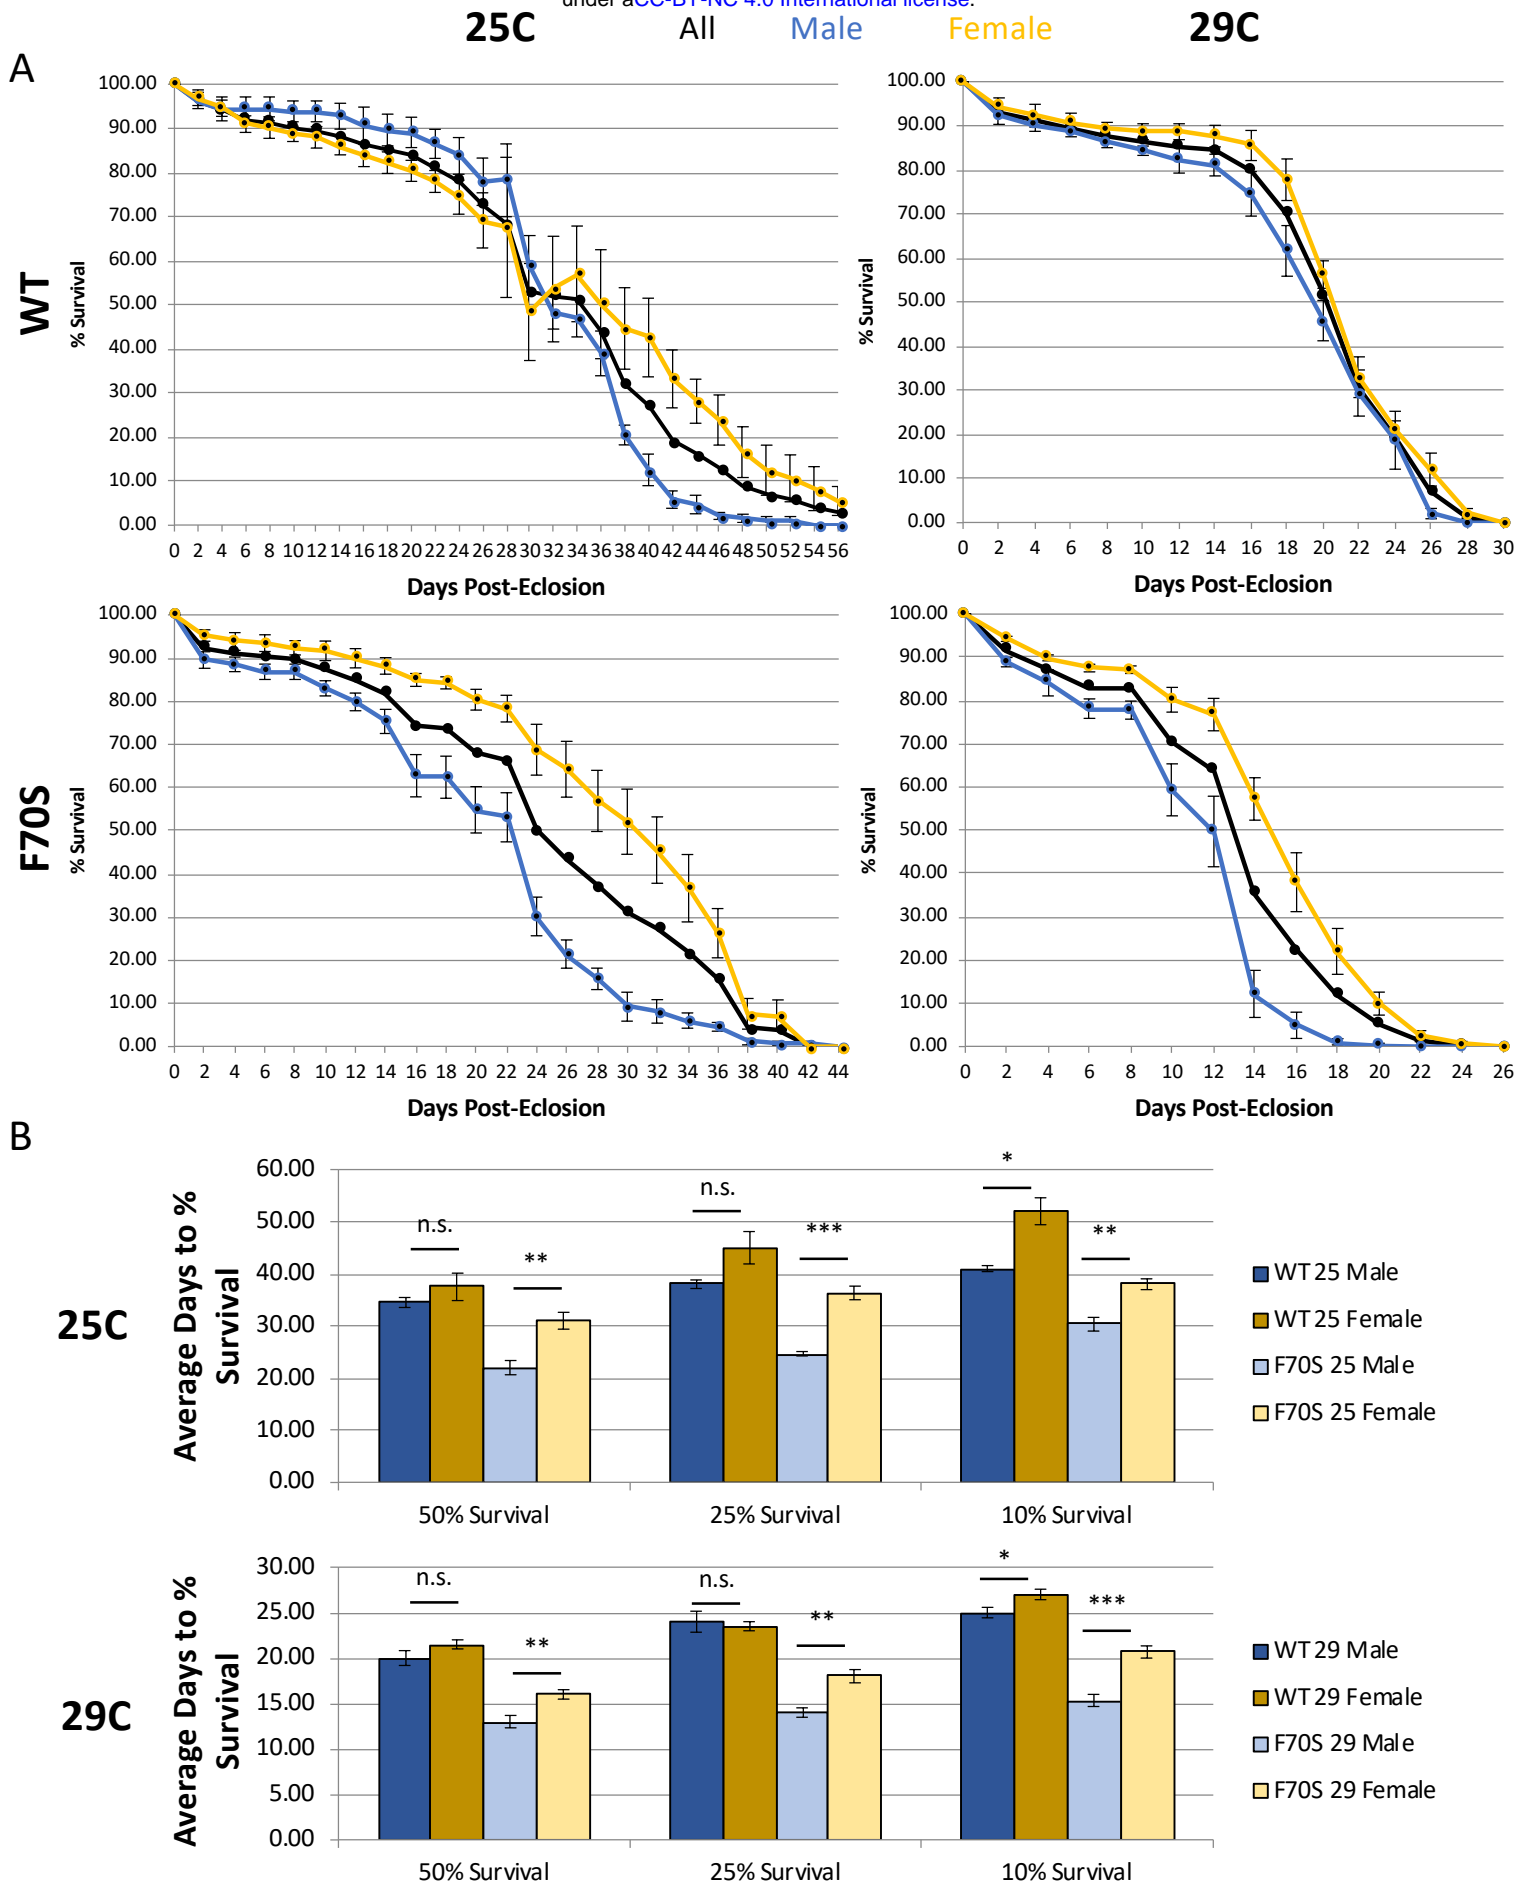

Fig. S3
